# Supplementary material
Source: publisher site journal article supplement (https://www.dovepress.com/article/614133)
Supplement: Supplementary file 1 [file 614133%20Supplementary%20Tables.pd]

**Table S1 — Classical / Clinically Used Semi-Synthetic Artemisinin in Thyroiditis**

| Compound            | Alias / Notes                       | Development status                            | Possible associated chemokines (First author et al., year)                      | Function in thyroiditis via chemokines (First author et al., year)                                            | Chemokine network nodes potentially affected (ligand→receptor) (First author et al., year)                                                                                                                                   |
|---------------------|-------------------------------------|-----------------------------------------------|---------------------------------------------------------------------------------|---------------------------------------------------------------------------------------------------------------|------------------------------------------------------------------------------------------------------------------------------------------------------------------------------------------------------------------------------|
| Artemisinin         | QHS; parent scaffold                | Clinical source compound / extract            | ↓CXCL10/CCL20/CCL2 in inflammatory models (Xie et al., 2024; Long et al., 2024) | Likely ↓Th1 recruitment (CXCL10) and ↓monocyte influx (CCL2) in AIT; NF-κB dampening (Long et al., 2024)      | IFN-γ-inducible CXCL9/10/11→CXCR3; CCL2→CCR2; CCL5→CCR5; CCL20→CCR6; CXCL8(IL-8)→CXCR1/2; CXCL12→CXCR4; CXCL13→CXCR5; CCL19/CCL21→CCR7; CX3CL1→CX3CR1 (Ferrari et al., 2023; Metzemaekers et al., 2018; Kleist et al., 2025) |
| Dihydroartemisinin  | DHA; artemimol                      | Clinical (active metabolite in ACTs)          | Blocks CXCL10–CXCR3 signaling; ↓NF-κB/PI3K-AKT (Liu et al., 2017)               | Attenuates AIT via CXCR3 axis inhibition; ↓serum CXCL10 as PD marker (Liu et al., 2017; Ferrari et al., 2023) | IFN-γ-inducible CXCL9/10/11→CXCR3; CCL2→CCR2; CCL5→CCR5; CCL20→CCR6; CXCL8(IL-8)→CXCR1/2; CXCL12→CXCR4; CXCL13→CXCR5; CCL19/CCL21→CCR7; CX3CL1→CX3CR1 (Ferrari et al., 2023; Metzemaekers et al., 2018; Kleist et al., 2025) |
| Artesunate (sodium) | Artesunic acid hemisuccinate; IV/PO | Clinical (severe malaria; anti-inflammatory ) | Reports of ↓CXCL10/↓CCL2; NF-κB inhibition (Long et al., 2024)                  | Potential ↓macrophage/T-cell influx via CCL2/CXCL10 lowering in AIT (Ferrari et al., 2023; Long et al., 2024) | IFN-γ-inducible CXCL9/10/11→CXCR3; CCL2→CCR2; CCL5→CCR5; CCL20→CCR6; CXCL8(IL-8)→CXCR1/2; CXCL12→CXCR4; CXCL13→CXCR5; CCL19/CCL21→CCR7; CX3CL1→CX3CR1 (Ferrari et al., 2023; Metzemaekers et al., 2018; Kleist et al., 2025) |

|                                    |                            |                                 |                                                                        |                                                                                                                              |                                                                                                                                                                                                                              |
|------------------------------------|----------------------------|---------------------------------|------------------------------------------------------------------------|------------------------------------------------------------------------------------------------------------------------------|------------------------------------------------------------------------------------------------------------------------------------------------------------------------------------------------------------------------------|
| Artemether                         | DHA methyl ether           | Clinical (oral/IM; ACT partner) | CXCL10 modulation suggested in combination studies (Long et al., 2024) | Possible ↓Th1 chemotaxis by dampening CXCL10 signaling in AIT (Ferrari et al., 2023)                                         | IFN-γ-inducible CXCL9/10/11→CXCR3; CCL2→CCR2; CCL5→CCR5; CCL20→CCR6; CXCL8(IL-8)→CXCR1/2; CXCL12→CXCR4; CXCL13→CXCR5; CCL19/CCL21→CCR7; CX3CL1→CX3CR1 (Ferrari et al., 2023; Metzemaekers et al., 2018; Kleist et al., 2025) |
| Arteether (β-arteether; artemotil) | DHA ethyl ether (β-isomer) | Clinical (IM in select regions) | Class-level NF-κB/chemokine suppression (Long et al., 2024)            | Probable ↓CXCL10/CCL2 output from innate cells in AIT (Ferrari et al., 2023; Long et al., 2024)                              | IFN-γ-inducible CXCL9/10/11→CXCR3; CCL2→CCR2; CCL5→CCR5; CCL20→CCR6; CXCL8(IL-8)→CXCR1/2; CXCL12→CXCR4; CXCL13→CXCR5; CCL19/CCL21→CCR7; CX3CL1→CX3CR1 (Ferrari et al., 2023; Metzemaekers et al., 2018; Kleist et al., 2025) |
| Artelinic acid                     | Benzoate analog of DHA     | Clinical-exploratory / research | Class-level chemokine effects (Long et al., 2024)                      | Potential ↓NF-κB-driven chemokines (CXCL10/CCL2) in thyroiditis; needs direct data (Ferrari et al., 2023; Long et al., 2024) | IFN-γ-inducible CXCL9/10/11→CXCR3; CCL2→CCR2; CCL5→CCR5; CCL20→CCR6; CXCL8(IL-8)→CXCR1/2; CXCL12→CXCR4; CXCL13→CXCR5; CCL19/CCL21→CCR7; CX3CL1→CX3CR1 (Ferrari et al., 2023; Metzemaekers et al., 2018; Kleist et al., 2025) |
| Artesunic acid (free acid)         | Parent of artesunate salts | Preclinical/chemistry           | As artesunate; NF-κB/chemokine suppression (Long et al., 2024)         | Expected ↓CXCL10/CCL2; monitor serum CXCL10 as PD (Ferrari et al., 2023)                                                     | IFN-γ-inducible CXCL9/10/11→CXCR3; CCL2→CCR2; CCL5→CCR5; CCL20→CCR6; CXCL8(IL-8)→CXCR1/2; CXCL12→CXCR4; CXCL13→CXCR5; CCL19/CCL21→CCR7;                                                                                      |

|                     |                       |                         |                                                                               |                                                                                                                  |                                                                                                                                                                                                                                          |
|---------------------|-----------------------|-------------------------|-------------------------------------------------------------------------------|------------------------------------------------------------------------------------------------------------------|------------------------------------------------------------------------------------------------------------------------------------------------------------------------------------------------------------------------------------------|
|                     |                       |                         |                                                                               |                                                                                                                  | CX3CL1→CX3CR1 (Ferrari et al., 2023; Metzemaekers et al., 2018; Kleist et al., 2025)                                                                                                                                                     |
| Artemisinin B       | Natural analog        | Research                | Class-level<br>↓CXCL10/CCL2/CCL20<br>(Xie et al., 2024)                       | Likely mirrors<br>artemisinin's<br>chemokine-lowering in<br>AIT context (Ferrari et al., 2023; Xie et al., 2024) | IFN-γ-inducible CXCL9/10/11→CXCR3; CCL2→CCR2;<br>CCL5→CCR5; CCL20→CCR6;<br>CXCL8(IL-8)→CXCR1/2; CXCL12→CXCR4;<br>CXCL13→CXCR5; CCL19/CCL21→CCR7;<br>CX3CL1→CX3CR1 (Ferrari et al., 2023; Metzemaekers et al., 2018; Kleist et al., 2025) |
| Artesunate (rectal) | Rectal AS             | Clinical<br>formulation | As artesunate; systemic<br>NF-κB/chemokine<br>suppression (Long et al., 2024) | Formulation variant;<br>function per artesunate<br>(Ferrari et al., 2023)                                        | IFN-γ-inducible CXCL9/10/11→CXCR3; CCL2→CCR2;<br>CCL5→CCR5; CCL20→CCR6;<br>CXCL8(IL-8)→CXCR1/2; CXCL12→CXCR4;<br>CXCL13→CXCR5; CCL19/CCL21→CCR7;<br>CX3CL1→CX3CR1 (Ferrari et al., 2023; Metzemaekers et al., 2018; Kleist et al., 2025) |
| DHA dispersible     | Pediatric oral<br>DHA | Clinical<br>formulation | As DHA (Liu et al., 2017)                                                     | Same thyroiditis<br>mechanism via<br>CXCL10/CXCR3 axis<br>(Liu et al., 2017; Ferrari et al., 2023)               | IFN-γ-inducible CXCL9/10/11→CXCR3; CCL2→CCR2;<br>CCL5→CCR5; CCL20→CCR6;<br>CXCL8(IL-8)→CXCR1/2; CXCL12→CXCR4;<br>CXCL13→CXCR5; CCL19/CCL21→CCR7;<br>CX3CL1→CX3CR1 (Ferrari et al., 2023; Metzemaekers et al., 2018; Kleist et al., 2025) |

|                                      |                   |                  |                                                                                                               |                                                                                                    |                                                                                                                                                                                                                                             |
|--------------------------------------|-------------------|------------------|---------------------------------------------------------------------------------------------------------------|----------------------------------------------------------------------------------------------------|---------------------------------------------------------------------------------------------------------------------------------------------------------------------------------------------------------------------------------------------|
| Dihydroarte<br>misinin<br>acetate    | DHA acetate       | Research/prodrug | No direct chemokine data;<br>assumed DHA-like<br>↓CXCL10/↓CCL2 via<br>NF-κB inhibition (Long et<br>al., 2024) | Possible ↓Th1 recruitment<br>(CXCL10 axis) in AIT<br>after conversion to DHA<br>(Liu et al., 2017) | IFN-γ-inducible CXCL9/10/11→CXCR3; CCL2→CCR2;<br>CCL5→CCR5; CCL20→CCR6;<br>CXCL8(IL-8)→CXCR1/2; CXCL12→CXCR4;<br>CXCL13→CXCR5; CCL19/CCL21→CCR7;<br>CX3CL1→CX3CR1 (Ferrari et al., 2023; Metzemaekers et<br>al., 2018; Kleist et al., 2025) |
| Dihydroarte<br>misinin<br>propionate | DHA<br>propionate | Research/prodrug | No direct chemokine data;<br>assumed DHA-like<br>↓CXCL10/↓CCL2 via<br>NF-κB inhibition (Long et<br>al., 2024) | Possible ↓Th1 recruitment<br>(CXCL10 axis) in AIT<br>after conversion to DHA<br>(Liu et al., 2017) | IFN-γ-inducible CXCL9/10/11→CXCR3; CCL2→CCR2;<br>CCL5→CCR5; CCL20→CCR6;<br>CXCL8(IL-8)→CXCR1/2; CXCL12→CXCR4;<br>CXCL13→CXCR5; CCL19/CCL21→CCR7;<br>CX3CL1→CX3CR1 (Ferrari et al., 2023; Metzemaekers et<br>al., 2018; Kleist et al., 2025) |
| Dihydroarte<br>misinin<br>butyrate   | DHA butyrate      | Research/prodrug | No direct chemokine data;<br>assumed DHA-like<br>↓CXCL10/↓CCL2 via<br>NF-κB inhibition (Long et<br>al., 2024) | Possible ↓Th1 recruitment<br>(CXCL10 axis) in AIT<br>after conversion to DHA<br>(Liu et al., 2017) | IFN-γ-inducible CXCL9/10/11→CXCR3; CCL2→CCR2;<br>CCL5→CCR5; CCL20→CCR6;<br>CXCL8(IL-8)→CXCR1/2; CXCL12→CXCR4;<br>CXCL13→CXCR5; CCL19/CCL21→CCR7;<br>CX3CL1→CX3CR1 (Ferrari et al., 2023; Metzemaekers et<br>al., 2018; Kleist et al., 2025) |
| Dihydroarte<br>misinin<br>valerate   | DHA valerate      | Research/prodrug | No direct chemokine data;<br>assumed DHA-like<br>↓CXCL10/↓CCL2 via                                            | Possible ↓Th1 recruitment<br>(CXCL10 axis) in AIT<br>after conversion to DHA<br>(Liu et al., 2017) | IFN-γ-inducible CXCL9/10/11→CXCR3; CCL2→CCR2;<br>CCL5→CCR5; CCL20→CCR6;<br>CXCL8(IL-8)→CXCR1/2; CXCL12→CXCR4;<br>CXCL13→CXCR5; CCL19/CCL21→CCR7;                                                                                            |

|                              |              |                  |                                                                                                      |                                                                                           |                                                                                                                                                                                                                              |
|------------------------------|--------------|------------------|------------------------------------------------------------------------------------------------------|-------------------------------------------------------------------------------------------|------------------------------------------------------------------------------------------------------------------------------------------------------------------------------------------------------------------------------|
|                              |              |                  | NF-κB inhibition (Long et al., 2024)                                                                 |                                                                                           | CX3CL1→CX3CR1 (Ferrari et al., 2023; Metzemaekers et al., 2018; Kleist et al., 2025)                                                                                                                                         |
| Dihydroarte misinin caproate | DHA caproate | Research/prodrug | No direct chemokine data; assumed DHA-like<br>↓CXCL10/↓CCL2 via NF-κB inhibition (Long et al., 2024) | Possible ↓Th1 recruitment (CXCL10 axis) in AIT after conversion to DHA (Liu et al., 2017) | IFN-γ-inducible CXCL9/10/11→CXCR3; CCL2→CCR2; CCL5→CCR5; CCL20→CCR6; CXCL8(IL-8)→CXCR1/2; CXCL12→CXCR4; CXCL13→CXCR5; CCL19/CCL21→CCR7; CX3CL1→CX3CR1 (Ferrari et al., 2023; Metzemaekers et al., 2018; Kleist et al., 2025) |
| Dihydroarte misinin pivalate | DHA pivalate | Research/prodrug | No direct chemokine data; assumed DHA-like<br>↓CXCL10/↓CCL2 via NF-κB inhibition (Long et al., 2024) | Possible ↓Th1 recruitment (CXCL10 axis) in AIT after conversion to DHA (Liu et al., 2017) | IFN-γ-inducible CXCL9/10/11→CXCR3; CCL2→CCR2; CCL5→CCR5; CCL20→CCR6; CXCL8(IL-8)→CXCR1/2; CXCL12→CXCR4; CXCL13→CXCR5; CCL19/CCL21→CCR7; CX3CL1→CX3CR1 (Ferrari et al., 2023; Metzemaekers et al., 2018; Kleist et al., 2025) |
| Dihydroarte misinin benzoate | DHA benzoate | Research/prodrug | No direct chemokine data; assumed DHA-like<br>↓CXCL10/↓CCL2 via NF-κB inhibition (Long et al., 2024) | Possible ↓Th1 recruitment (CXCL10 axis) in AIT after conversion to DHA (Liu et al., 2017) | IFN-γ-inducible CXCL9/10/11→CXCR3; CCL2→CCR2; CCL5→CCR5; CCL20→CCR6; CXCL8(IL-8)→CXCR1/2; CXCL12→CXCR4; CXCL13→CXCR5; CCL19/CCL21→CCR7; CX3CL1→CX3CR1 (Ferrari et al., 2023; Metzemaekers et al., 2018; Kleist et al., 2025) |

|                                                |                             |                         |                                                                                                               |                                                                                                               |                                                                                                                                                                                                                                             |
|------------------------------------------------|-----------------------------|-------------------------|---------------------------------------------------------------------------------------------------------------|---------------------------------------------------------------------------------------------------------------|---------------------------------------------------------------------------------------------------------------------------------------------------------------------------------------------------------------------------------------------|
| Dihydroarte<br>misinin<br>p-chloroben<br>zoate | DHA<br>p-chlorobenzo<br>ate | Research/prodrug        | No direct chemokine data;<br>assumed DHA-like<br>↓CXCL10/↓CCL2 via<br>NF-κB inhibition (Long et<br>al., 2024) | Possible ↓Th1 recruitment<br>(CXCL10 axis) in AIT<br>after conversion to DHA<br>(Liu et al., 2017)            | IFN-γ-inducible CXCL9/10/11→CXCR3; CCL2→CCR2;<br>CCL5→CCR5; CCL20→CCR6;<br>CXCL8(IL-8)→CXCR1/2; CXCL12→CXCR4;<br>CXCL13→CXCR5; CCL19/CCL21→CCR7;<br>CX3CL1→CX3CR1 (Ferrari et al., 2023; Metzemaekers et<br>al., 2018; Kleist et al., 2025) |
| Dihydroarte<br>misinin<br>cinnamate            | DHA<br>cinnamate            | Research/prodrug        | No direct chemokine data;<br>assumed DHA-like<br>↓CXCL10/↓CCL2 via<br>NF-κB inhibition (Long et<br>al., 2024) | Possible ↓Th1 recruitment<br>(CXCL10 axis) in AIT<br>after conversion to DHA<br>(Liu et al., 2017)            | IFN-γ-inducible CXCL9/10/11→CXCR3; CCL2→CCR2;<br>CCL5→CCR5; CCL20→CCR6;<br>CXCL8(IL-8)→CXCR1/2; CXCL12→CXCR4;<br>CXCL13→CXCR5; CCL19/CCL21→CCR7;<br>CX3CL1→CX3CR1 (Ferrari et al., 2023; Metzemaekers et<br>al., 2018; Kleist et al., 2025) |
| Dihydroarte<br>misinin<br>carbonate            | DHA<br>carbonate            | Research/prodrug        | No direct chemokine data;<br>assumed DHA-like<br>↓CXCL10/↓CCL2 via<br>NF-κB inhibition (Long et<br>al., 2024) | Possible ↓Th1 recruitment<br>(CXCL10 axis) in AIT<br>after conversion to DHA<br>(Liu et al., 2017)            | IFN-γ-inducible CXCL9/10/11→CXCR3; CCL2→CCR2;<br>CCL5→CCR5; CCL20→CCR6;<br>CXCL8(IL-8)→CXCR1/2; CXCL12→CXCR4;<br>CXCL13→CXCR5; CCL19/CCL21→CCR7;<br>CX3CL1→CX3CR1 (Ferrari et al., 2023; Metzemaekers et<br>al., 2018; Kleist et al., 2025) |
| DHA methyl<br>ether                            | Artemether —<br>see #4      | Research<br>(chemistry) | No direct chemokine data;<br>class-level<br>NF-κB/chemokine                                                   | Potential ↓CXCL10/CCL2<br>output; prioritize DHA/AS<br>clinically (Ferrari et al.,<br>2023; Liu et al., 2017) | IFN-γ-inducible CXCL9/10/11→CXCR3; CCL2→CCR2;<br>CCL5→CCR5; CCL20→CCR6;<br>CXCL8(IL-8)→CXCR1/2; CXCL12→CXCR4;<br>CXCL13→CXCR5; CCL19/CCL21→CCR7;                                                                                            |

|                     |                     |                      |                                                                                       |                                                                                                      |                                                                                                                                                                                                                              |
|---------------------|---------------------|----------------------|---------------------------------------------------------------------------------------|------------------------------------------------------------------------------------------------------|------------------------------------------------------------------------------------------------------------------------------------------------------------------------------------------------------------------------------|
|                     |                     |                      | suppression (Long et al., 2024)                                                       |                                                                                                      | CX3CL1→CX3CR1 (Ferrari et al., 2023; Metzemaekers et al., 2018; Kleist et al., 2025)                                                                                                                                         |
| DHA ethyl ether     | Arteether — see #5  | Research (chemistry) | No direct chemokine data; class-level NF-κB/chemokine suppression (Long et al., 2024) | Potential ↓CXCL10/CCL2 output; prioritize DHA/AS clinically (Ferrari et al., 2023; Liu et al., 2017) | IFN-γ-inducible CXCL9/10/11→CXCR3; CCL2→CCR2; CCL5→CCR5; CCL20→CCR6; CXCL8(IL-8)→CXCR1/2; CXCL12→CXCR4; CXCL13→CXCR5; CCL19/CCL21→CCR7; CX3CL1→CX3CR1 (Ferrari et al., 2023; Metzemaekers et al., 2018; Kleist et al., 2025) |
| DHA propyl ether    | C-10 propyl ether   | Research (chemistry) | No direct chemokine data; class-level NF-κB/chemokine suppression (Long et al., 2024) | Potential ↓CXCL10/CCL2 output; prioritize DHA/AS clinically (Ferrari et al., 2023; Liu et al., 2017) | IFN-γ-inducible CXCL9/10/11→CXCR3; CCL2→CCR2; CCL5→CCR5; CCL20→CCR6; CXCL8(IL-8)→CXCR1/2; CXCL12→CXCR4; CXCL13→CXCR5; CCL19/CCL21→CCR7; CX3CL1→CX3CR1 (Ferrari et al., 2023; Metzemaekers et al., 2018; Kleist et al., 2025) |
| DHA isopropyl ether | C-10 i-propyl ether | Research (chemistry) | No direct chemokine data; class-level NF-κB/chemokine suppression (Long et al., 2024) | Potential ↓CXCL10/CCL2 output; prioritize DHA/AS clinically (Ferrari et al., 2023; Liu et al., 2017) | IFN-γ-inducible CXCL9/10/11→CXCR3; CCL2→CCR2; CCL5→CCR5; CCL20→CCR6; CXCL8(IL-8)→CXCR1/2; CXCL12→CXCR4; CXCL13→CXCR5; CCL19/CCL21→CCR7; CX3CL1→CX3CR1 (Ferrari et al., 2023; Metzemaekers et al., 2018; Kleist et al., 2025) |
| DHA butyl ether     | C-10 butyl ether    | Research (chemistry) | No direct chemokine data; class-level                                                 | Potential ↓CXCL10/CCL2 output; prioritize DHA/AS                                                     | IFN-γ-inducible CXCL9/10/11→CXCR3; CCL2→CCR2; CCL5→CCR5; CCL20→CCR6;                                                                                                                                                         |

|                  |                   |                      |                                                                                       |                                                                                                      |                                                                                                                                                                                                                              |
|------------------|-------------------|----------------------|---------------------------------------------------------------------------------------|------------------------------------------------------------------------------------------------------|------------------------------------------------------------------------------------------------------------------------------------------------------------------------------------------------------------------------------|
|                  |                   |                      | NF-κB/chemokine suppression (Long et al., 2024)                                       | clinically (Ferrari et al., 2023; Liu et al., 2017)                                                  | CXCL8(IL-8)→CXCR1/2; CXCL12→CXCR4; CXCL13→CXCR5; CCL19/CCL21→CCR7; CX3CL1→CX3CR1 (Ferrari et al., 2023; Metzemaekers et al., 2018; Kleist et al., 2025)                                                                      |
| DHA pentyl ether | C-10 pentyl ether | Research (chemistry) | No direct chemokine data; class-level NF-κB/chemokine suppression (Long et al., 2024) | Potential ↓CXCL10/CCL2 output; prioritize DHA/AS clinically (Ferrari et al., 2023; Liu et al., 2017) | IFN-γ-inducible CXCL9/10/11→CXCR3; CCL2→CCR2; CCL5→CCR5; CCL20→CCR6; CXCL8(IL-8)→CXCR1/2; CXCL12→CXCR4; CXCL13→CXCR5; CCL19/CCL21→CCR7; CX3CL1→CX3CR1 (Ferrari et al., 2023; Metzemaekers et al., 2018; Kleist et al., 2025) |
| DHA benzyl ether | C-10 benzyl ether | Research (chemistry) | No direct chemokine data; class-level NF-κB/chemokine suppression (Long et al., 2024) | Potential ↓CXCL10/CCL2 output; prioritize DHA/AS clinically (Ferrari et al., 2023; Liu et al., 2017) | IFN-γ-inducible CXCL9/10/11→CXCR3; CCL2→CCR2; CCL5→CCR5; CCL20→CCR6; CXCL8(IL-8)→CXCR1/2; CXCL12→CXCR4; CXCL13→CXCR5; CCL19/CCL21→CCR7; CX3CL1→CX3CR1 (Ferrari et al., 2023; Metzemaekers et al., 2018; Kleist et al., 2025) |
| DHA allyl ether  | C-10 allyl ether  | Research (chemistry) | No direct chemokine data; class-level NF-κB/chemokine suppression (Long et al., 2024) | Potential ↓CXCL10/CCL2 output; prioritize DHA/AS clinically (Ferrari et al., 2023; Liu et al., 2017) | IFN-γ-inducible CXCL9/10/11→CXCR3; CCL2→CCR2; CCL5→CCR5; CCL20→CCR6; CXCL8(IL-8)→CXCR1/2; CXCL12→CXCR4; CXCL13→CXCR5; CCL19/CCL21→CCR7; CX3CL1→CX3CR1 (Ferrari et al., 2023; Metzemaekers et al., 2018; Kleist et al., 2025) |

|                        |                      |                      |                                                                                       |                                                                                                        |                                                                                                                                                                                                                              |
|------------------------|----------------------|----------------------|---------------------------------------------------------------------------------------|--------------------------------------------------------------------------------------------------------|------------------------------------------------------------------------------------------------------------------------------------------------------------------------------------------------------------------------------|
| DHA propargyl ether    | C-10 propargyl ether | Research (chemistry) | No direct chemokine data; class-level NF-κB/chemokine suppression (Long et al., 2024) | Potential ↓CXCL10/CCL2 output; prioritize DHA/AS clinically (Ferrari et al., 2023; Liu et al., 2017)   | IFN-γ-inducible CXCL9/10/11→CXCR3; CCL2→CCR2; CCL5→CCR5; CCL20→CCR6; CXCL8(IL-8)→CXCR1/2; CXCL12→CXCR4; CXCL13→CXCR5; CCL19/CCL21→CCR7; CX3CL1→CX3CR1 (Ferrari et al., 2023; Metzemaekers et al., 2018; Kleist et al., 2025) |
| DHA benzylidene acetal | C-10 acetal variant  | Research (chemistry) | No direct chemokine data; class-level NF-κB/chemokine suppression (Long et al., 2024) | Potential ↓CXCL10/CCL2 output; prioritize DHA/AS clinically (Ferrari et al., 2023; Liu et al., 2017)   | IFN-γ-inducible CXCL9/10/11→CXCR3; CCL2→CCR2; CCL5→CCR5; CCL20→CCR6; CXCL8(IL-8)→CXCR1/2; CXCL12→CXCR4; CXCL13→CXCR5; CCL19/CCL21→CCR7; CX3CL1→CX3CR1 (Ferrari et al., 2023; Metzemaekers et al., 2018; Kleist et al., 2025) |
| Artesunate α-epimer    | Stereoisomeric form  | Research/formulation | Class-level: ↓CXCL10/CCL2 via NF-κB pathway (Long et al., 2024; Xie et al., 2024)     | Possible ↓thyroidal chemokines; extrapolated from DHA/AS data (Ferrari et al., 2023; Liu et al., 2017) | IFN-γ-inducible CXCL9/10/11→CXCR3; CCL2→CCR2; CCL5→CCR5; CCL20→CCR6; CXCL8(IL-8)→CXCR1/2; CXCL12→CXCR4; CXCL13→CXCR5; CCL19/CCL21→CCR7; CX3CL1→CX3CR1 (Ferrari et al., 2023; Metzemaekers et al., 2018; Kleist et al., 2025) |
| Artesunate β-epimer    | Stereoisomeric form  | Research/formulation | Class-level: ↓CXCL10/CCL2 via NF-κB pathway (Long et al., 2024; Xie et al., 2024)     | Possible ↓thyroidal chemokines; extrapolated from DHA/AS data                                          | IFN-γ-inducible CXCL9/10/11→CXCR3; CCL2→CCR2; CCL5→CCR5; CCL20→CCR6; CXCL8(IL-8)→CXCR1/2; CXCL12→CXCR4; CXCL13→CXCR5; CCL19/CCL21→CCR7;                                                                                      |

|                              |                        |                               |                                                                                   |                                                                                                        |                                                                                                                                                                                                                              |
|------------------------------|------------------------|-------------------------------|-----------------------------------------------------------------------------------|--------------------------------------------------------------------------------------------------------|------------------------------------------------------------------------------------------------------------------------------------------------------------------------------------------------------------------------------|
|                              |                        |                               |                                                                                   | (Ferrari et al., 2023; Liu et al., 2017)                                                               | CX3CL1→CX3CR1 (Ferrari et al., 2023; Metzemaekers et al., 2018; Kleist et al., 2025)                                                                                                                                         |
| Artemether lipid formulation | Lipid-based AM         | Clinical formulation          | Class-level: ↓CXCL10/CCL2 via NF-κB pathway (Long et al., 2024; Xie et al., 2024) | Possible ↓thyroidal chemokines; extrapolated from DHA/AS data (Ferrari et al., 2023; Liu et al., 2017) | IFN-γ-inducible CXCL9/10/11→CXCR3; CCL2→CCR2; CCL5→CCR5; CCL20→CCR6; CXCL8(IL-8)→CXCR1/2; CXCL12→CXCR4; CXCL13→CXCR5; CCL19/CCL21→CCR7; CX3CL1→CX3CR1 (Ferrari et al., 2023; Metzemaekers et al., 2018; Kleist et al., 2025) |
| Sodium artelinate            | Salt of artelinic acid | Research/clinical-exploratory | Class-level: ↓CXCL10/CCL2 via NF-κB pathway (Long et al., 2024; Xie et al., 2024) | Possible ↓thyroidal chemokines; extrapolated from DHA/AS data (Ferrari et al., 2023; Liu et al., 2017) | IFN-γ-inducible CXCL9/10/11→CXCR3; CCL2→CCR2; CCL5→CCR5; CCL20→CCR6; CXCL8(IL-8)→CXCR1/2; CXCL12→CXCR4; CXCL13→CXCR5; CCL19/CCL21→CCR7; CX3CL1→CX3CR1 (Ferrari et al., 2023; Metzemaekers et al., 2018; Kleist et al., 2025) |
| DHA hemisuccinate            | Pro-drug               | Research/formulation          | Class-level: ↓CXCL10/CCL2 via NF-κB pathway (Long et al., 2024; Xie et al., 2024) | Possible ↓thyroidal chemokines; extrapolated from DHA/AS data (Ferrari et al., 2023; Liu et al., 2017) | IFN-γ-inducible CXCL9/10/11→CXCR3; CCL2→CCR2; CCL5→CCR5; CCL20→CCR6; CXCL8(IL-8)→CXCR1/2; CXCL12→CXCR4; CXCL13→CXCR5; CCL19/CCL21→CCR7; CX3CL1→CX3CR1 (Ferrari et al., 2023; Metzemaekers et al., 2018; Kleist et al., 2025) |

|                   |               |                      |                                                                                      |                                                                                                        |                                                                                                                                                                                                                              |
|-------------------|---------------|----------------------|--------------------------------------------------------------------------------------|--------------------------------------------------------------------------------------------------------|------------------------------------------------------------------------------------------------------------------------------------------------------------------------------------------------------------------------------|
| DHA hemiglutarate | Pro-drug      | Research/formulation | Class-level:<br>↓CXCL10/CCL2 via NF-κB pathway (Long et al., 2024; Xie et al., 2024) | Possible ↓thyroidal chemokines; extrapolated from DHA/AS data (Ferrari et al., 2023; Liu et al., 2017) | IFN-γ-inducible CXCL9/10/11→CXCR3; CCL2→CCR2; CCL5→CCR5; CCL20→CCR6; CXCL8(IL-8)→CXCR1/2; CXCL12→CXCR4; CXCL13→CXCR5; CCL19/CCL21→CCR7; CX3CL1→CX3CR1 (Ferrari et al., 2023; Metzemaekers et al., 2018; Kleist et al., 2025) |
| DHA phosphate     | Pro-drug      | Research/formulation | Class-level:<br>↓CXCL10/CCL2 via NF-κB pathway (Long et al., 2024; Xie et al., 2024) | Possible ↓thyroidal chemokines; extrapolated from DHA/AS data (Ferrari et al., 2023; Liu et al., 2017) | IFN-γ-inducible CXCL9/10/11→CXCR3; CCL2→CCR2; CCL5→CCR5; CCL20→CCR6; CXCL8(IL-8)→CXCR1/2; CXCL12→CXCR4; CXCL13→CXCR5; CCL19/CCL21→CCR7; CX3CL1→CX3CR1 (Ferrari et al., 2023; Metzemaekers et al., 2018; Kleist et al., 2025) |
| DHA nicotinate    | Pyridyl ester | Research             | Class-level:<br>↓CXCL10/CCL2 via NF-κB pathway (Long et al., 2024; Xie et al., 2024) | Possible ↓thyroidal chemokines; extrapolated from DHA/AS data (Ferrari et al., 2023; Liu et al., 2017) | IFN-γ-inducible CXCL9/10/11→CXCR3; CCL2→CCR2; CCL5→CCR5; CCL20→CCR6; CXCL8(IL-8)→CXCR1/2; CXCL12→CXCR4; CXCL13→CXCR5; CCL19/CCL21→CCR7; CX3CL1→CX3CR1 (Ferrari et al., 2023; Metzemaekers et al., 2018; Kleist et al., 2025) |
| DHA salicylate    | Aryl ester    | Research             | Class-level:<br>↓CXCL10/CCL2 via NF-κB pathway (Long et al., 2024; Xie et al., 2024) | Possible ↓thyroidal chemokines; extrapolated from DHA/AS data                                          | IFN-γ-inducible CXCL9/10/11→CXCR3; CCL2→CCR2; CCL5→CCR5; CCL20→CCR6; CXCL8(IL-8)→CXCR1/2; CXCL12→CXCR4; CXCL13→CXCR5; CCL19/CCL21→CCR7;                                                                                      |

|                     |                       |          |                                                                                      |                                                                                                        |                                                                                                                                                                                                                              |
|---------------------|-----------------------|----------|--------------------------------------------------------------------------------------|--------------------------------------------------------------------------------------------------------|------------------------------------------------------------------------------------------------------------------------------------------------------------------------------------------------------------------------------|
|                     |                       |          |                                                                                      | (Ferrari et al., 2023; Liu et al., 2017)                                                               | CX3CL1→CX3CR1 (Ferrari et al., 2023; Metzemaekers et al., 2018; Kleist et al., 2025)                                                                                                                                         |
| DHA<br>ibuprofenate | Hybrid<br>NSAID ester | Research | Class-level:<br>↓CXCL10/CCL2 via NF-κB pathway (Long et al., 2024; Xie et al., 2024) | Possible ↓thyroidal chemokines; extrapolated from DHA/AS data (Ferrari et al., 2023; Liu et al., 2017) | IFN-γ-inducible CXCL9/10/11→CXCR3; CCL2→CCR2; CCL5→CCR5; CCL20→CCR6; CXCL8(IL-8)→CXCR1/2; CXCL12→CXCR4; CXCL13→CXCR5; CCL19/CCL21→CCR7; CX3CL1→CX3CR1 (Ferrari et al., 2023; Metzemaekers et al., 2018; Kleist et al., 2025) |

**Notes:** ↓ indicates decreased, reduced, or suppressed expression/activity; → indicates a ligand-to-receptor chemokine axis or signaling relationship. These symbols are used only as directional/relational shorthand and do not imply quantitative effect size.

## References

- Liu H., et al. Dihydroartemisinin attenuates autoimmune thyroiditis by inhibiting the CXCR3/PI3K/AKT/NF-κB pathway. *Oncotarget*. 2017;8(70):115028–115040.
- Ferrari S.M., et al. Chemokines in thyroid autoimmunity. *Best Pract Res Clin Endocrinol Metab*. 2023;37(4):101750.
- Xie K., et al. Artemisinin and its derivatives as promising therapies for autoimmune and inflammatory diseases. *Heliyon*. 2024;10(14):e29544.
- Long Z., et al. Advances in the study of artemisinin and its derivatives for autoimmune and inflammatory diseases. *Front Immunol*. 2024;15:1432625.
- Metzemaekers M., et al. Overview of the mechanisms that may contribute to chemokine heterogeneity. *Front Immunol*. 2018;8:1970.
- Kleist A.B., et al. Encoding and decoding selectivity and promiscuity in the chemokine network. *Cell*. 2025; 188 (13):3603-3622.
- Shin C., et al. Comprehensive analysis of chemokine gene polymorphisms in autoimmune thyroid disease. *Sci Rep*. 2023;13.

**Table S2. Amino-artemisinins & Water-soluble Immunomodulatory Analogs in Thyroiditis**

| <b>Compound</b> | <b>Alias / Notes</b>                                        | <b>Development status</b>             | <b>Possible associated chemokines (First author et al., year)</b>                                 | <b>Function in thyroiditis via chemokines (First author et al., year)</b>                                                  | <b>Chemokine network nodes potentially affected (ligand→receptor) (First author et al., year)</b>                                                                                                                                                                 |
|-----------------|-------------------------------------------------------------|---------------------------------------|---------------------------------------------------------------------------------------------------|----------------------------------------------------------------------------------------------------------------------------|-------------------------------------------------------------------------------------------------------------------------------------------------------------------------------------------------------------------------------------------------------------------|
| Artemisone      | 10-amino-artemisinin sulfone; enhanced stability            | Advanced preclinical / early clinical | ↓NF-κB-driven chemokines (e.g., CXCL10/CCL2) at class level (Xie et al., 2024; Long et al., 2024) | Predicted ↓Th1 (CXCL10/CXCR3) and monocyte (CCL2/CCR2) traffic in AIT; propose CXCL10 PD monitoring (Ferrari et al., 2023) | Autoimmune thyroiditis–focused axes: CXCL9/10/11→CXCR3; CCL2→CCR2; CCL5→CCR5; CCL20→CCR6; CXCL12→CXCR4; CXCL13→CXCR5; CCL19/CCL21→CCR7; CX3CL1→CX3CR1 (Ferrari et al., 2023; Rotondi et al., 2007; Kimura et al., 2007; Domberg et al., 2008; Shin et al., 2023). |
| Artemiside      | 10-amino-artemisinin thio-morpholine; prodrug of artemisone | Preclinical                           | Class-level chemokine reductions via NF-κB/PI3K-AKT modulation (Xie et al., 2024)                 | Potential AIT benefit via ↓CXCL10/CCL2; mechanistic alignment with DHA (Liu et al., 2017)                                  | Autoimmune thyroiditis–focused axes: CXCL9/10/11→CXCR3; CCL2→CCR2; CCL5→CCR5; CCL20→CCR6; CXCL12→CXCR4; CXCL13→CXCR5; CCL19/CCL21→CCR7; CX3CL1→CX3CR1 (Ferrari et al., 2023; Rotondi et al., 2007; Kimura et al., 2007; Domberg et al., 2008; Shin et al., 2023). |
| Artemisox       | Oxime analog in artemisone/i de tetrad                      | Preclinical                           | Class-level (Xie et al., 2024)                                                                    | Possible ↓CXCL10/CCL2; requires targeted AIT studies (Ferrari et al., 2023)                                                | Autoimmune thyroiditis–focused axes: CXCL9/10/11→CXCR3; CCL2→CCR2; CCL5→CCR5; CCL20→CCR6; CXCL12→CXCR4; CXCL13→CXCR5; CCL19/CCL21→CCR7; CX3CL1→CX3CR1 (Ferrari et al., 2023; Rotondi et al., 2007; Kimura et al., 2007; Domberg et al., 2008; Shin et al., 2023). |

|                                                |                                                           |                                     |                                                                                     |                                                                                                    |                                                                                                                                                                                                                                                                   |
|------------------------------------------------|-----------------------------------------------------------|-------------------------------------|-------------------------------------------------------------------------------------|----------------------------------------------------------------------------------------------------|-------------------------------------------------------------------------------------------------------------------------------------------------------------------------------------------------------------------------------------------------------------------|
| M1<br>(artemisine<br>metabolite<br>metabolite) | Active<br>metabolite<br>informing<br>systemic<br>exposure | Preclinical                         | Class-level (Xie et al., 2024)                                                      | Expected to mirror artemisine chemokine effects; candidate PD marker tie-in (Ferrari et al., 2023) | Autoimmune thyroiditis–focused axes: CXCL9/10/11→CXCR3; CCL2→CCR2; CCL5→CCR5; CCL20→CCR6; CXCL12→CXCR4; CXCL13→CXCR5; CCL19/CCL21→CCR7; CX3CL1→CX3CR1 (Ferrari et al., 2023; Rotondi et al., 2007; Kimura et al., 2007; Domberg et al., 2008; Shin et al., 2023). |
| 11-aza-artem<br>isinin<br>(prototype 9)        | Amino-funct<br>ionalized<br>scaffold                      | Preclinical<br>(Singh et al., 2014) | Class-level;<br>network-relevant<br>reductions in<br>CXCL10/CCL2 (Xie et al., 2024) | Hypothesized<br>↓CXCL10/CXCR3 axis<br>in AIT (Ferrari et al., 2023)                                | Autoimmune thyroiditis–focused axes: CXCL9/10/11→CXCR3; CCL2→CCR2; CCL5→CCR5; CCL20→CCR6; CXCL12→CXCR4; CXCL13→CXCR5; CCL19/CCL21→CCR7; CX3CL1→CX3CR1 (Ferrari et al., 2023; Rotondi et al., 2007; Kimura et al., 2007; Domberg et al., 2008; Shin et al., 2023). |
| 11-aza-artem<br>isinin<br>derivatives<br>12a-g | Amino/hydr<br>oxy<br>derivatives                          | Preclinical<br>(Singh et al., 2014) | Class-level<br>chemokine impact<br>(Xie et al., 2024)                               | Predicted<br>↓Th1/monocyte<br>recruitment via<br>CXCL10/CCL2 (Ferrari et al., 2023)                | Autoimmune thyroiditis–focused axes: CXCL9/10/11→CXCR3; CCL2→CCR2; CCL5→CCR5; CCL20→CCR6; CXCL12→CXCR4; CXCL13→CXCR5; CCL19/CCL21→CCR7; CX3CL1→CX3CR1 (Ferrari et al., 2023; Rotondi et al., 2007; Kimura et al., 2007; Domberg et al., 2008; Shin et al., 2023). |
| 11-aza-artem<br>isinin<br>derivatives<br>13a-g | Amino/hydr<br>oxy<br>derivatives                          | Preclinical<br>(Singh et al., 2014) | Class-level (Xie et al., 2024)                                                      | Predicted AIT benefit via<br>CXCL10/CCL2<br>modulation (Ferrari et al., 2023)                      | Autoimmune thyroiditis–focused axes: CXCL9/10/11→CXCR3; CCL2→CCR2; CCL5→CCR5; CCL20→CCR6; CXCL12→CXCR4; CXCL13→CXCR5; CCL19/CCL21→CCR7; CX3CL1→CX3CR1 (Ferrari et al., 2023; Rotondi et al., 2007; Kimura et al., 2007; Domberg et al., 2008; Shin et al., 2023). |

|                                      |                                           |                                                 |                                                                                           |                                                                                                                             |                                                                                                                                                                                                                                                                   |
|--------------------------------------|-------------------------------------------|-------------------------------------------------|-------------------------------------------------------------------------------------------|-----------------------------------------------------------------------------------------------------------------------------|-------------------------------------------------------------------------------------------------------------------------------------------------------------------------------------------------------------------------------------------------------------------|
| 11-aza-artemisinin derivatives 14a-g | Amino/hydroxy derivatives                 | Preclinical (Singh et al., 2014)                | Class-level (Xie et al., 2024)                                                            | As above (Ferrari et al., 2023)                                                                                             | Autoimmune thyroiditis–focused axes: CXCL9/10/11→CXCR3; CCL2→CCR2; CCL5→CCR5; CCL20→CCR6; CXCL12→CXCR4; CXCL13→CXCR5; CCL19/CCL21→CCR7; CX3CL1→CX3CR1 (Ferrari et al., 2023; Rotondi et al., 2007; Kimura et al., 2007; Domberg et al., 2008; Shin et al., 2023). |
| 11-aza-artemisinin derivatives 15a-c | Amino/hydroxy derivatives                 | Preclinical (Singh et al., 2014)                | Class-level (Xie et al., 2024)                                                            | As above (Ferrari et al., 2023)                                                                                             | Autoimmune thyroiditis–focused axes: CXCL9/10/11→CXCR3; CCL2→CCR2; CCL5→CCR5; CCL20→CCR6; CXCL12→CXCR4; CXCL13→CXCR5; CCL19/CCL21→CCR7; CX3CL1→CX3CR1 (Ferrari et al., 2023; Rotondi et al., 2007; Kimura et al., 2007; Domberg et al., 2008; Shin et al., 2023). |
| WHN-11                               | Newer amino-artemisinin lead              | Preclinical                                     | Class-level (Long et al., 2024)                                                           | Potential<br>↓CXCL10/CCL2;<br>warrants testing in AIT assays (Ferrari et al., 2023)                                         | Autoimmune thyroiditis–focused axes: CXCL9/10/11→CXCR3; CCL2→CCR2; CCL5→CCR5; CCL20→CCR6; CXCL12→CXCR4; CXCL13→CXCR5; CCL19/CCL21→CCR7; CX3CL1→CX3CR1 (Ferrari et al., 2023; Rotondi et al., 2007; Kimura et al., 2007; Domberg et al., 2008; Shin et al., 2023). |
| SM934                                | β-amino-arterether maleate; water-soluble | Preclinical in autoimmunity (Tong et al., 2022) | ↓NF-κB/TLR signaling; reported ↓pro-inflammatory cytokines/chemokines (Tong et al., 2022) | Likely ↓CXCL10/CCL2 in AIT; Treg↑/Th1/Th17↓ suggests upstream chemokine dampening (Tong et al., 2022; Ferrari et al., 2023) | Autoimmune thyroiditis–focused axes: CXCL9/10/11→CXCR3; CCL2→CCR2; CCL5→CCR5; CCL20→CCR6; CXCL12→CXCR4; CXCL13→CXCR5; CCL19/CCL21→CCR7; CX3CL1→CX3CR1 (Ferrari et al., 2023; Rotondi et al., 2007; Kimura et al., 2007; Domberg et al., 2008; Shin et al., 2023). |

|                                  |                                             |                                                  |                                                                                       |                                                                            |                                                                                                                                                                                                                                                                   |
|----------------------------------|---------------------------------------------|--------------------------------------------------|---------------------------------------------------------------------------------------|----------------------------------------------------------------------------|-------------------------------------------------------------------------------------------------------------------------------------------------------------------------------------------------------------------------------------------------------------------|
| SM905                            | Water-soluble artemisinin derivative        | Preclinical/R A models (Wang et al., 2007; 2008) | ↓Inflammatory mediators; immunosuppressive (Wang et al., 2007; Wang et al., 2008)     | Potential ↓CXCL10/CCL2 and ↓cell recruitment in AIT (Ferrari et al., 2023) | Autoimmune thyroiditis–focused axes: CXCL9/10/11→CXCR3; CCL2→CCR2; CCL5→CCR5; CCL20→CCR6; CXCL12→CXCR4; CXCL13→CXCR5; CCL19/CCL21→CCR7; CX3CL1→CX3CR1 (Ferrari et al., 2023; Rotondi et al., 2007; Kimura et al., 2007; Domberg et al., 2008; Shin et al., 2023). |
| SM735                            | 3-(12-β-artemisinoxy) phenoxy succinic acid | Preclinical (Zhou et al., 2005)                  | Strong immunosuppression; class-level chemokine dampening assumed (Zhou et al., 2005) | Hypothesized ↓Th1 trafficking (CXCL10) in AIT (Ferrari et al., 2023)       | Autoimmune thyroiditis–focused axes: CXCL9/10/11→CXCR3; CCL2→CCR2; CCL5→CCR5; CCL20→CCR6; CXCL12→CXCR4; CXCL13→CXCR5; CCL19/CCL21→CCR7; CX3CL1→CX3CR1 (Ferrari et al., 2023; Rotondi et al., 2007; Kimura et al., 2007; Domberg et al., 2008; Shin et al., 2023). |
| Artemisone-pheroid               | Delivery platform enhancing exposure        | Preclinical                                      | Improved delivery may enhance chemokine suppression (Long et al., 2024)               | Potential stronger ↓CXCL10 PD response in AIT (Ferrari et al., 2023)       | Autoimmune thyroiditis–focused axes: CXCL9/10/11→CXCR3; CCL2→CCR2; CCL5→CCR5; CCL20→CCR6; CXCL12→CXCR4; CXCL13→CXCR5; CCL19/CCL21→CCR7; CX3CL1→CX3CR1 (Ferrari et al., 2023; Rotondi et al., 2007; Kimura et al., 2007; Domberg et al., 2008; Shin et al., 2023). |
| Amino-artemisinin urea analog A1 | Aryl-urea amino-artemisinin                 | Preclinical                                      | Class-level NF-κB/chemokine reductions (Xie et al., 2024)                             | Possible ↓CXCL10/CCL2 in AIT (Ferrari et al., 2023)                        | Autoimmune thyroiditis–focused axes: CXCL9/10/11→CXCR3; CCL2→CCR2; CCL5→CCR5; CCL20→CCR6; CXCL12→CXCR4; CXCL13→CXCR5; CCL19/CCL21→CCR7; CX3CL1→CX3CR1 (Ferrari et al., 2023; Rotondi et al., 2007; Kimura et al., 2007; Domberg et al., 2008; Shin et al., 2023). |

|                                              |                                       |             |                                    |                                    |                                                                                                                                                                                                                                                                               |
|----------------------------------------------|---------------------------------------|-------------|------------------------------------|------------------------------------|-------------------------------------------------------------------------------------------------------------------------------------------------------------------------------------------------------------------------------------------------------------------------------|
| Amino-arte<br>misinin<br>amide<br>analog A2  | Aryl-amide<br>amino-artem<br>isinin   | Preclinical | Class-level (Xie et<br>al., 2024)  | As above (Ferrari et al.,<br>2023) | Autoimmune thyroiditis–focused axes: CXCL9/10/11→CXCR3;<br>CCL2→CCR2; CCL5→CCR5; CCL20→CCR6; CXCL12→CXCR4;<br>CXCL13→CXCR5; CCL19/CCL21→CCR7; CX3CL1→CX3CR1 (Ferrari<br>et al., 2023; Rotondi et al., 2007; Kimura et al., 2007; Domberg et al., 2008;<br>Shin et al., 2023). |
| Amino-arte<br>misinin<br>series B<br>(B1-B4) | Series<br>placeholder<br>(literature) | Preclinical | Class-level (Long et<br>al., 2024) | As above (Ferrari et al.,<br>2023) | Autoimmune thyroiditis–focused axes: CXCL9/10/11→CXCR3;<br>CCL2→CCR2; CCL5→CCR5; CCL20→CCR6; CXCL12→CXCR4;<br>CXCL13→CXCR5; CCL19/CCL21→CCR7; CX3CL1→CX3CR1 (Ferrari<br>et al., 2023; Rotondi et al., 2007; Kimura et al., 2007; Domberg et al., 2008;<br>Shin et al., 2023). |
| Amino-arte<br>misinin<br>series C<br>(C1-C4) | Series<br>placeholder<br>(literature) | Preclinical | Class-level (Long et<br>al., 2024) | As above (Ferrari et al.,<br>2023) | Autoimmune thyroiditis–focused axes: CXCL9/10/11→CXCR3;<br>CCL2→CCR2; CCL5→CCR5; CCL20→CCR6; CXCL12→CXCR4;<br>CXCL13→CXCR5; CCL19/CCL21→CCR7; CX3CL1→CX3CR1 (Ferrari<br>et al., 2023; Rotondi et al., 2007; Kimura et al., 2007; Domberg et al., 2008;<br>Shin et al., 2023). |
| Amino-arte<br>misinin<br>series D<br>(D1-D4) | Series<br>placeholder<br>(literature) | Preclinical | Class-level (Xie et<br>al., 2024)  | As above (Ferrari et al.,<br>2023) | Autoimmune thyroiditis–focused axes: CXCL9/10/11→CXCR3;<br>CCL2→CCR2; CCL5→CCR5; CCL20→CCR6; CXCL12→CXCR4;<br>CXCL13→CXCR5; CCL19/CCL21→CCR7; CX3CL1→CX3CR1 (Ferrari<br>et al., 2023; Rotondi et al., 2007; Kimura et al., 2007; Domberg et al., 2008;<br>Shin et al., 2023). |

|                                              |                                               |                                                   |                                 |                                                            |                                                                                                                                                                                                                                                                   |
|----------------------------------------------|-----------------------------------------------|---------------------------------------------------|---------------------------------|------------------------------------------------------------|-------------------------------------------------------------------------------------------------------------------------------------------------------------------------------------------------------------------------------------------------------------------|
| Amino-arte<br>misinin<br>series E<br>(E1-E4) | Series<br>placeholder<br>(literature)         | Preclinical                                       | Class-level (Xie et al., 2024)  | As above (Ferrari et al., 2023)                            | Autoimmune thyroiditis–focused axes: CXCL9/10/11→CXCR3; CCL2→CCR2; CCL5→CCR5; CCL20→CCR6; CXCL12→CXCR4; CXCL13→CXCR5; CCL19/CCL21→CCR7; CX3CL1→CX3CR1 (Ferrari et al., 2023; Rotondi et al., 2007; Kimura et al., 2007; Domberg et al., 2008; Shin et al., 2023). |
| SM933                                        | Related SM<br>series<br>amino-artem<br>isinin | Preclinical<br>(reported in<br>series<br>reviews) | Class-level (Tong et al., 2022) | Potential<br>↓CXCL10/CCL2 in AIT<br>(Ferrari et al., 2023) | Autoimmune thyroiditis–focused axes: CXCL9/10/11→CXCR3; CCL2→CCR2; CCL5→CCR5; CCL20→CCR6; CXCL12→CXCR4; CXCL13→CXCR5; CCL19/CCL21→CCR7; CX3CL1→CX3CR1 (Ferrari et al., 2023; Rotondi et al., 2007; Kimura et al., 2007; Domberg et al., 2008; Shin et al., 2023). |
| SM736                                        | Related to<br>SM735<br>(series)               | Preclinical                                       | Class-level (Zhou et al., 2005) | As above (Ferrari et al., 2023)                            | Autoimmune thyroiditis–focused axes: CXCL9/10/11→CXCR3; CCL2→CCR2; CCL5→CCR5; CCL20→CCR6; CXCL12→CXCR4; CXCL13→CXCR5; CCL19/CCL21→CCR7; CX3CL1→CX3CR1 (Ferrari et al., 2023; Rotondi et al., 2007; Kimura et al., 2007; Domberg et al., 2008; Shin et al., 2023). |
| SM737                                        | Related<br>series analog                      | Preclinical                                       | Class-level (Zhou et al., 2005) | As above (Ferrari et al., 2023)                            | Autoimmune thyroiditis–focused axes: CXCL9/10/11→CXCR3; CCL2→CCR2; CCL5→CCR5; CCL20→CCR6; CXCL12→CXCR4; CXCL13→CXCR5; CCL19/CCL21→CCR7; CX3CL1→CX3CR1 (Ferrari et al., 2023; Rotondi et al., 2007; Kimura et al., 2007; Domberg et al., 2008; Shin et al., 2023). |
| SM738                                        | Related<br>series analog                      | Preclinical                                       | Class-level (Zhou et al., 2005) | As above (Ferrari et al., 2023)                            | Autoimmune thyroiditis–focused axes: CXCL9/10/11→CXCR3; CCL2→CCR2; CCL5→CCR5; CCL20→CCR6; CXCL12→CXCR4;                                                                                                                                                           |

|                          |                          |             |                                 |                                 |                                                                                                                                                                                                                                                                   |
|--------------------------|--------------------------|-------------|---------------------------------|---------------------------------|-------------------------------------------------------------------------------------------------------------------------------------------------------------------------------------------------------------------------------------------------------------------|
|                          |                          |             |                                 |                                 | CXCL13→CXCR5; CCL19/CCL21→CCR7; CX3CL1→CX3CR1 (Ferrari et al., 2023; Rotondi et al., 2007; Kimura et al., 2007; Domberg et al., 2008; Shin et al., 2023).                                                                                                         |
| SM939                    | Related SM series analog | Preclinical | Class-level (Tong et al., 2022) | As above (Ferrari et al., 2023) | Autoimmune thyroiditis–focused axes: CXCL9/10/11→CXCR3; CCL2→CCR2; CCL5→CCR5; CCL20→CCR6; CXCL12→CXCR4; CXCL13→CXCR5; CCL19/CCL21→CCR7; CX3CL1→CX3CR1 (Ferrari et al., 2023; Rotondi et al., 2007; Kimura et al., 2007; Domberg et al., 2008; Shin et al., 2023). |
| Artemisone analogue AN-1 | 10-amino variant         | Preclinical | Class-level (Xie et al., 2024)  | As above (Ferrari et al., 2023) | Autoimmune thyroiditis–focused axes: CXCL9/10/11→CXCR3; CCL2→CCR2; CCL5→CCR5; CCL20→CCR6; CXCL12→CXCR4; CXCL13→CXCR5; CCL19/CCL21→CCR7; CX3CL1→CX3CR1 (Ferrari et al., 2023; Rotondi et al., 2007; Kimura et al., 2007; Domberg et al., 2008; Shin et al., 2023). |
| Artemisone analogue AN-2 | 10-amino variant         | Preclinical | Class-level (Xie et al., 2024)  | As above (Ferrari et al., 2023) | Autoimmune thyroiditis–focused axes: CXCL9/10/11→CXCR3; CCL2→CCR2; CCL5→CCR5; CCL20→CCR6; CXCL12→CXCR4; CXCL13→CXCR5; CCL19/CCL21→CCR7; CX3CL1→CX3CR1 (Ferrari et al., 2023; Rotondi et al., 2007; Kimura et al., 2007; Domberg et al., 2008; Shin et al., 2023). |
| Artemiside analogue AI-1 | 10-amino variant         | Preclinical | Class-level (Long et al., 2024) | As above (Ferrari et al., 2023) | Autoimmune thyroiditis–focused axes: CXCL9/10/11→CXCR3; CCL2→CCR2; CCL5→CCR5; CCL20→CCR6; CXCL12→CXCR4; CXCL13→CXCR5; CCL19/CCL21→CCR7; CX3CL1→CX3CR1 (Ferrari et al., 2023; Rotondi et al., 2007; Kimura et al., 2007; Domberg et al., 2008; Shin et al., 2023). |

|                                     |                                |                                  |                                 |                                 |                                                                                                                                                                                                                                                                   |
|-------------------------------------|--------------------------------|----------------------------------|---------------------------------|---------------------------------|-------------------------------------------------------------------------------------------------------------------------------------------------------------------------------------------------------------------------------------------------------------------|
|                                     |                                |                                  |                                 |                                 | et al., 2023; Rotondi et al., 2007; Kimura et al., 2007; Domberg et al., 2008; Shin et al., 2023).                                                                                                                                                                |
| Artemiside analogue AI-2            | 10-amino variant               | Preclinical                      | Class-level (Long et al., 2024) | As above (Ferrari et al., 2023) | Autoimmune thyroiditis–focused axes: CXCL9/10/11→CXCR3; CCL2→CCR2; CCL5→CCR5; CCL20→CCR6; CXCL12→CXCR4; CXCL13→CXCR5; CCL19/CCL21→CCR7; CX3CL1→CX3CR1 (Ferrari et al., 2023; Rotondi et al., 2007; Kimura et al., 2007; Domberg et al., 2008; Shin et al., 2023). |
| 11-azaartemi sinin ether E-1        | Ether derivative of 11-aza     | Preclinical (Singh et al., 2014) | Class-level (Xie et al., 2024)  | As above (Ferrari et al., 2023) | Autoimmune thyroiditis–focused axes: CXCL9/10/11→CXCR3; CCL2→CCR2; CCL5→CCR5; CCL20→CCR6; CXCL12→CXCR4; CXCL13→CXCR5; CCL19/CCL21→CCR7; CX3CL1→CX3CR1 (Ferrari et al., 2023; Rotondi et al., 2007; Kimura et al., 2007; Domberg et al., 2008; Shin et al., 2023). |
| 11-azaartemi sinin ether E-2        | Ether derivative of 11-aza     | Preclinical (Singh et al., 2014) | Class-level (Xie et al., 2024)  | As above (Ferrari et al., 2023) | Autoimmune thyroiditis–focused axes: CXCL9/10/11→CXCR3; CCL2→CCR2; CCL5→CCR5; CCL20→CCR6; CXCL12→CXCR4; CXCL13→CXCR5; CCL19/CCL21→CCR7; CX3CL1→CX3CR1 (Ferrari et al., 2023; Rotondi et al., 2007; Kimura et al., 2007; Domberg et al., 2008; Shin et al., 2023). |
| 11-azaartemi sinin linker dimer L-1 | Linker-based dimer from 11-aza | Preclinical (Singh et al., 2014) | Class-level (Xie et al., 2024)  | As above (Ferrari et al., 2023) | Autoimmune thyroiditis–focused axes: CXCL9/10/11→CXCR3; CCL2→CCR2; CCL5→CCR5; CCL20→CCR6; CXCL12→CXCR4; CXCL13→CXCR5; CCL19/CCL21→CCR7; CX3CL1→CX3CR1 (Ferrari et al., 2023; Rotondi et al., 2007; Kimura et al., 2007; Domberg et al., 2008; Shin et al., 2023). |

|                                               |                                       |                                                      |                                                                               |                                                                    |                                                                                                                                                                                                                                                                               |
|-----------------------------------------------|---------------------------------------|------------------------------------------------------|-------------------------------------------------------------------------------|--------------------------------------------------------------------|-------------------------------------------------------------------------------------------------------------------------------------------------------------------------------------------------------------------------------------------------------------------------------|
| 11-azaartemi<br>sinin linker<br>dimer L-2     | Linker-based<br>dimer from<br>11-aza  | Preclinical<br>(Singh et al.,<br>2014)               | Class-level (Xie et<br>al., 2024)                                             | As above (Ferrari et al.,<br>2023)                                 | Autoimmune thyroiditis–focused axes: CXCL9/10/11→CXCR3;<br>CCL2→CCR2; CCL5→CCR5; CCL20→CCR6; CXCL12→CXCR4;<br>CXCL13→CXCR5; CCL19/CCL21→CCR7; CX3CL1→CX3CR1 (Ferrari<br>et al., 2023; Rotondi et al., 2007; Kimura et al., 2007; Domberg et al., 2008;<br>Shin et al., 2023). |
| SM934 salt<br>(maleate)                       | Clinical salt<br>form                 | Preclinical/p<br>rocessing<br>(Tong et al.,<br>2022) | As SM934 (Tong et<br>al., 2022)                                               | As SM934 (Tong et al.,<br>2022; Ferrari et al.,<br>2023)           | Autoimmune thyroiditis–focused axes: CXCL9/10/11→CXCR3;<br>CCL2→CCR2; CCL5→CCR5; CCL20→CCR6; CXCL12→CXCR4;<br>CXCL13→CXCR5; CCL19/CCL21→CCR7; CX3CL1→CX3CR1 (Ferrari<br>et al., 2023; Rotondi et al., 2007; Kimura et al., 2007; Domberg et al., 2008;<br>Shin et al., 2023). |
| SM905<br>sodium                               | Water-solubl<br>e salt                | Preclinical<br>(Wang et al.,<br>2007; 2008)          | As SM905 (Wang et<br>al., 2007; Wang et al.,<br>2008)                         | As SM905 (Ferrari et al.,<br>2023)                                 | Autoimmune thyroiditis–focused axes: CXCL9/10/11→CXCR3;<br>CCL2→CCR2; CCL5→CCR5; CCL20→CCR6; CXCL12→CXCR4;<br>CXCL13→CXCR5; CCL19/CCL21→CCR7; CX3CL1→CX3CR1 (Ferrari<br>et al., 2023; Rotondi et al., 2007; Kimura et al., 2007; Domberg et al., 2008;<br>Shin et al., 2023). |
| Amino-arte<br>misinin<br>nanoparticle<br>NP-1 | Formulation<br>to improve<br>exposure | Preclinical                                          | Enhanced delivery<br>may enhance<br>chemokine lowering<br>(Long et al., 2024) | Potential stronger<br>CXCL10 PD response<br>(Ferrari et al., 2023) | Autoimmune thyroiditis–focused axes: CXCL9/10/11→CXCR3;<br>CCL2→CCR2; CCL5→CCR5; CCL20→CCR6; CXCL12→CXCR4;<br>CXCL13→CXCR5; CCL19/CCL21→CCR7; CX3CL1→CX3CR1 (Ferrari<br>et al., 2023; Rotondi et al., 2007; Kimura et al., 2007; Domberg et al., 2008;<br>Shin et al., 2023). |

|                                               |                                       |             |                                                                         |                                 |                                                                                                                                                                                                                                                                   |
|-----------------------------------------------|---------------------------------------|-------------|-------------------------------------------------------------------------|---------------------------------|-------------------------------------------------------------------------------------------------------------------------------------------------------------------------------------------------------------------------------------------------------------------|
| Amino-arte<br>misinin<br>nanoparticle<br>NP-2 | Formulation<br>to improve<br>exposure | Preclinical | As above (Long et al., 2024)                                            | As above (Ferrari et al., 2023) | Autoimmune thyroiditis–focused axes: CXCL9/10/11→CXCR3; CCL2→CCR2; CCL5→CCR5; CCL20→CCR6; CXCL12→CXCR4; CXCL13→CXCR5; CCL19/CCL21→CCR7; CX3CL1→CX3CR1 (Ferrari et al., 2023; Rotondi et al., 2007; Kimura et al., 2007; Domberg et al., 2008; Shin et al., 2023). |
| Amino-arte<br>misinin<br>PEGylate<br>PG-1     | Solubility-en<br>hanced<br>conjugate  | Preclinical | Class-level (Xie et al., 2024)                                          | As above (Ferrari et al., 2023) | Autoimmune thyroiditis–focused axes: CXCL9/10/11→CXCR3; CCL2→CCR2; CCL5→CCR5; CCL20→CCR6; CXCL12→CXCR4; CXCL13→CXCR5; CCL19/CCL21→CCR7; CX3CL1→CX3CR1 (Ferrari et al., 2023; Rotondi et al., 2007; Kimura et al., 2007; Domberg et al., 2008; Shin et al., 2023). |
| Amino-arte<br>misinin<br>PEGylate<br>PG-2     | Solubility-en<br>hanced<br>conjugate  | Preclinical | Class-level (Xie et al., 2024)                                          | As above (Ferrari et al., 2023) | Autoimmune thyroiditis–focused axes: CXCL9/10/11→CXCR3; CCL2→CCR2; CCL5→CCR5; CCL20→CCR6; CXCL12→CXCR4; CXCL13→CXCR5; CCL19/CCL21→CCR7; CX3CL1→CX3CR1 (Ferrari et al., 2023; Rotondi et al., 2007; Kimura et al., 2007; Domberg et al., 2008; Shin et al., 2023). |
| Artemisone-<br>cyclodextrin<br>complex        | Solubilized<br>complex                | Preclinical | Potential for<br>increased chemokine<br>suppression (Long et al., 2024) | As above (Ferrari et al., 2023) | Autoimmune thyroiditis–focused axes: CXCL9/10/11→CXCR3; CCL2→CCR2; CCL5→CCR5; CCL20→CCR6; CXCL12→CXCR4; CXCL13→CXCR5; CCL19/CCL21→CCR7; CX3CL1→CX3CR1 (Ferrari et al., 2023; Rotondi et al., 2007; Kimura et al., 2007; Domberg et al., 2008; Shin et al., 2023). |

|                                        |                        |             |                                 |                                    |                                                                                                                                                                                                                                                                               |
|----------------------------------------|------------------------|-------------|---------------------------------|------------------------------------|-------------------------------------------------------------------------------------------------------------------------------------------------------------------------------------------------------------------------------------------------------------------------------|
| Artemiside-c<br>yclodextrin<br>complex | Solubilized<br>complex | Preclinical | As above (Long et<br>al., 2024) | As above (Ferrari et al.,<br>2023) | Autoimmune thyroiditis–focused axes: CXCL9/10/11→CXCR3;<br>CCL2→CCR2; CCL5→CCR5; CCL20→CCR6; CXCL12→CXCR4;<br>CXCL13→CXCR5; CCL19/CCL21→CCR7; CX3CL1→CX3CR1 (Ferrari<br>et al., 2023; Rotondi et al., 2007; Kimura et al., 2007; Domberg et al., 2008;<br>Shin et al., 2023). |
|----------------------------------------|------------------------|-------------|---------------------------------|------------------------------------|-------------------------------------------------------------------------------------------------------------------------------------------------------------------------------------------------------------------------------------------------------------------------------|

**Notes:** ↓ indicates decreased, reduced, or suppressed expression/activity; ↑ indicates increased or enhanced expression/activity; → indicates a ligand-to-receptor chemokine axis or signaling relationship. These symbols are used only as directional/relational shorthand and do not imply quantitative effect size.

## References

- Tong X., et al. Artemisinin derivative SM934 in the treatment of autoimmune and inflammatory diseases. *Front Pharmacol.* 2022;13:1033753.
- Xie K., et al. Artemisinin and its derivatives as promising therapies for autoimmune and inflammatory diseases. *Heliyon.* 2024;10(14):e29544.
- Long Z., et al. Advances in the study of artemisinin and its derivatives for autoimmune and inflammatory diseases. *Front Immunol.* 2024;15:1432625.
- Liu H., et al. Dihydroartemisinin attenuates autoimmune thyroiditis by inhibiting the CXCR3/PI3K/AKT/NF-κB signaling pathway. *Oncotarget.* 2017;8(70):115028–115040.
- Ferrari S.M., et al. Chemokines in thyroid autoimmunity. *Best Pract Res Clin Endocrinol Metab.* 2023;37(4):101750.
- Wang J.X., et al. The new water-soluble artemisinin derivative SM905 displays potent immunosuppressive effects in CIA. *Br J Pharmacol.* 2008;153(7):1303–1310.
- Wang J.X., et al. Suppressive effect of novel water-soluble artemisinin derivative SM905 in vitro and in vivo. *Eur J Pharmacol.* 2007;564(1–3):211–218.
- Zhou W., et al. A novel artemisinin derivative, SM735, shows strong immunosuppressive activity. *Acta Pharmacol Sin.* 2005;26(11):1352–1358.
- Singh C., et al. New orally active amino-/hydroxy-functionalized 11-azaartemisinins and derivatives. *Bioorg Med Chem.* 2014;22(6):2066–2080.

**Table S3. Fully Synthetic Ozonides / Trioxolanes in Thyroiditis**

| <b>Compound</b>            | <b>Alias / Notes</b>                                | <b>Development status</b>                          | <b>Possible associated chemokines (First author et al., year)</b>                                                                                    | <b>Function in thyroiditis via chemokines (First author et al., year)</b>                                                 | <b>Chemokine network nodes potentially affected (ligand→receptor) (First author et al., year)</b>                                                                                                                                                                             |
|----------------------------|-----------------------------------------------------|----------------------------------------------------|------------------------------------------------------------------------------------------------------------------------------------------------------|---------------------------------------------------------------------------------------------------------------------------|-------------------------------------------------------------------------------------------------------------------------------------------------------------------------------------------------------------------------------------------------------------------------------|
| OZ277                      | Arterolane;<br>RBx11160;<br>synthetic<br>trioxolane | Clinical<br>(approved<br>combo in<br>some regions) | Class-level<br>↓NF-κB-driven<br>chemokines plausible;<br>indirect evidence via<br>peroxide MoA (Ismail et<br>al., 2016; Giannangelo et<br>al., 2019) | Potential<br>↓CXCL10/CCL2 output<br>and ↓Th1/monocyte<br>influx in AIT (Ferrari et<br>al., 2023; Rotondi et al.,<br>2007) | Autoimmune thyroiditis–focused axes: CXCL9/10/11→CXCR3;<br>CCL2→CCR2; CCL5→CCR5; CCL20→CCR6;<br>CXCL12→CXCR4; CXCL13→CXCR5; CCL19/CCL21→CCR7;<br>CX3CL1→CX3CR1 (Ferrari et al., 2023; Rotondi et al., 2007;<br>Kimura et al., 2007; Domberg et al., 2008; Shin et al., 2023). |
| OZ439                      | Artefenomel;<br>long t½ (~50<br>h)                  | Clinical<br>(phase 2);<br>long-acting<br>ozonide   | Peroxide-driven<br>redox/protein alkylation<br>may lower<br>pro-inflammatory<br>chemokines (Ismail et<br>al., 2016; Siddiqui et al.,<br>2022)        | Sustained network<br>modulation<br>hypothetically<br>↓CXCL10/CCL2 in AIT;<br>needs direct study<br>(Ferrari et al., 2023) | Autoimmune thyroiditis–focused axes: CXCL9/10/11→CXCR3;<br>CCL2→CCR2; CCL5→CCR5; CCL20→CCR6;<br>CXCL12→CXCR4; CXCL13→CXCR5; CCL19/CCL21→CCR7;<br>CX3CL1→CX3CR1 (Ferrari et al., 2023; Rotondi et al., 2007;<br>Kimura et al., 2007; Domberg et al., 2008; Shin et al., 2023). |
| Arterolane-p<br>iperaquine | Fixed-dose<br>combination                           | Clinical<br>(phase 3)                              | As arterolane class;<br>indirect chemokine<br>suppression via NF-κB                                                                                  | Potential adjunct to<br>dampen CXCL10/CCL2<br>signals in inflammatory                                                     | Autoimmune thyroiditis–focused axes: CXCL9/10/11→CXCR3;<br>CCL2→CCR2; CCL5→CCR5; CCL20→CCR6;<br>CXCL12→CXCR4; CXCL13→CXCR5; CCL19/CCL21→CCR7;                                                                                                                                 |

|       |                       |             |                                                                                    |                                                                               |                                                                                                                                                                                                                                                                   |
|-------|-----------------------|-------------|------------------------------------------------------------------------------------|-------------------------------------------------------------------------------|-------------------------------------------------------------------------------------------------------------------------------------------------------------------------------------------------------------------------------------------------------------------|
|       |                       |             | reduction (Giannangelo et al., 2019)                                               | contexts (Ferrari et al., 2023)                                               | CX3CL1→CX3CR1 (Ferrari et al., 2023; Rotondi et al., 2007; Kimura et al., 2007; Domberg et al., 2008; Shin et al., 2023).                                                                                                                                         |
| OZ493 | Second-gen trioxolane | Preclinical | Class-level peroxide effects; network consequences plausible (Ismail et al., 2016) | Hypothesized ↓CXCL10/CCL2; monitor CXCL10 PD if tested (Ferrari et al., 2023) | Autoimmune thyroiditis–focused axes: CXCL9/10/11→CXCR3; CCL2→CCR2; CCL5→CCR5; CCL20→CCR6; CXCL12→CXCR4; CXCL13→CXCR5; CCL19/CCL21→CCR7; CX3CL1→CX3CR1 (Ferrari et al., 2023; Rotondi et al., 2007; Kimura et al., 2007; Domberg et al., 2008; Shin et al., 2023). |
| OZ609 | Second-gen trioxolane | Preclinical | As above (Ismail et al., 2016)                                                     | As above (Ferrari et al., 2023)                                               | Autoimmune thyroiditis–focused axes: CXCL9/10/11→CXCR3; CCL2→CCR2; CCL5→CCR5; CCL20→CCR6; CXCL12→CXCR4; CXCL13→CXCR5; CCL19/CCL21→CCR7; CX3CL1→CX3CR1 (Ferrari et al., 2023; Rotondi et al., 2007; Kimura et al., 2007; Domberg et al., 2008; Shin et al., 2023). |
| OZ655 | Second-gen trioxolane | Preclinical | As above (Ismail et al., 2016)                                                     | As above (Ferrari et al., 2023)                                               | Autoimmune thyroiditis–focused axes: CXCL9/10/11→CXCR3; CCL2→CCR2; CCL5→CCR5; CCL20→CCR6; CXCL12→CXCR4; CXCL13→CXCR5; CCL19/CCL21→CCR7; CX3CL1→CX3CR1 (Ferrari et al., 2023; Rotondi et al., 2007; Kimura et al., 2007; Domberg et al., 2008; Shin et al., 2023). |
| OZ657 | Second-gen trioxolane | Preclinical | As above (Ismail et al., 2016)                                                     | As above (Ferrari et al., 2023)                                               | Autoimmune thyroiditis–focused axes: CXCL9/10/11→CXCR3; CCL2→CCR2; CCL5→CCR5; CCL20→CCR6; CXCL12→CXCR4; CXCL13→CXCR5; CCL19/CCL21→CCR7; CX3CL1→CX3CR1 (Ferrari et al., 2023; Rotondi et al., 2007; Kimura et al., 2007; Domberg et al., 2008; Shin et al., 2023). |

|               |                           |             |                                                                      |                                                                          |                                                                                                                                                                                                                                                                   |
|---------------|---------------------------|-------------|----------------------------------------------------------------------|--------------------------------------------------------------------------|-------------------------------------------------------------------------------------------------------------------------------------------------------------------------------------------------------------------------------------------------------------------|
| OZ418         | Trioxolane lead (library) | Preclinical | As above (Giannangelo et al., 2019)                                  | As above (Ferrari et al., 2023)                                          | Autoimmune thyroiditis–focused axes: CXCL9/10/11→CXCR3; CCL2→CCR2; CCL5→CCR5; CCL20→CCR6; CXCL12→CXCR4; CXCL13→CXCR5; CCL19/CCL21→CCR7; CX3CL1→CX3CR1 (Ferrari et al., 2023; Rotondi et al., 2007; Kimura et al., 2007; Domberg et al., 2008; Shin et al., 2023). |
| OZ401         | Trioxolane analog         | Preclinical | As above (Giannangelo et al., 2019)                                  | As above (Ferrari et al., 2023)                                          | Autoimmune thyroiditis–focused axes: CXCL9/10/11→CXCR3; CCL2→CCR2; CCL5→CCR5; CCL20→CCR6; CXCL12→CXCR4; CXCL13→CXCR5; CCL19/CCL21→CCR7; CX3CL1→CX3CR1 (Ferrari et al., 2023; Rotondi et al., 2007; Kimura et al., 2007; Domberg et al., 2008; Shin et al., 2023). |
| OZ277 maleate | Salt form of arterolane   | Clinical    | As arterolane (Saha et al., 2014)                                    | As arterolane (Ferrari et al., 2023)                                     | Autoimmune thyroiditis–focused axes: CXCL9/10/11→CXCR3; CCL2→CCR2; CCL5→CCR5; CCL20→CCR6; CXCL12→CXCR4; CXCL13→CXCR5; CCL19/CCL21→CCR7; CX3CL1→CX3CR1 (Ferrari et al., 2023; Rotondi et al., 2007; Kimura et al., 2007; Domberg et al., 2008; Shin et al., 2023). |
| RLA-3107      | OZ439 regioisomer lead    | Preclinical | Peroxide protein-alkylation/redox disruption (Siddiqui et al., 2022) | Potential prolonged ↓chemokine output vs monomers (Ferrari et al., 2023) | Autoimmune thyroiditis–focused axes: CXCL9/10/11→CXCR3; CCL2→CCR2; CCL5→CCR5; CCL20→CCR6; CXCL12→CXCR4; CXCL13→CXCR5; CCL19/CCL21→CCR7; CX3CL1→CX3CR1 (Ferrari et al., 2023; Rotondi et al., 2007; Kimura et al., 2007; Domberg et al., 2008; Shin et al., 2023). |
| RLA-4735      | Next-gen trioxolane       | Preclinical | As above (Siddiqui et al., 2022)                                     | As above (Ferrari et al., 2023)                                          | Autoimmune thyroiditis–focused axes: CXCL9/10/11→CXCR3; CCL2→CCR2; CCL5→CCR5; CCL20→CCR6;                                                                                                                                                                         |

|          |                              |             |                                  |                                 |                                                                                                                                                                                                                                                                   |
|----------|------------------------------|-------------|----------------------------------|---------------------------------|-------------------------------------------------------------------------------------------------------------------------------------------------------------------------------------------------------------------------------------------------------------------|
|          |                              |             |                                  |                                 | CXCL12→CXCR4; CXCL13→CXCR5; CCL19/CCL21→CCR7;<br>CX3CL1→CX3CR1 (Ferrari et al., 2023; Rotondi et al., 2007; Kimura et al., 2007; Domberg et al., 2008; Shin et al., 2023).                                                                                        |
| RLA-5764 | Enantiopure form of RLA-4735 | Preclinical | As above (Siddiqui et al., 2022) | As above (Ferrari et al., 2023) | Autoimmune thyroiditis–focused axes: CXCL9/10/11→CXCR3; CCL2→CCR2; CCL5→CCR5; CCL20→CCR6; CXCL12→CXCR4; CXCL13→CXCR5; CCL19/CCL21→CCR7; CX3CL1→CX3CR1 (Ferrari et al., 2023; Rotondi et al., 2007; Kimura et al., 2007; Domberg et al., 2008; Shin et al., 2023). |
| RLA-4801 | Next-gen library member      | Preclinical | As above (Siddiqui et al., 2022) | As above (Ferrari et al., 2023) | Autoimmune thyroiditis–focused axes: CXCL9/10/11→CXCR3; CCL2→CCR2; CCL5→CCR5; CCL20→CCR6; CXCL12→CXCR4; CXCL13→CXCR5; CCL19/CCL21→CCR7; CX3CL1→CX3CR1 (Ferrari et al., 2023; Rotondi et al., 2007; Kimura et al., 2007; Domberg et al., 2008; Shin et al., 2023). |
| RLA-4825 | Next-gen library member      | Preclinical | As above (Siddiqui et al., 2022) | As above (Ferrari et al., 2023) | Autoimmune thyroiditis–focused axes: CXCL9/10/11→CXCR3; CCL2→CCR2; CCL5→CCR5; CCL20→CCR6; CXCL12→CXCR4; CXCL13→CXCR5; CCL19/CCL21→CCR7; CX3CL1→CX3CR1 (Ferrari et al., 2023; Rotondi et al., 2007; Kimura et al., 2007; Domberg et al., 2008; Shin et al., 2023). |
| RLA-4860 | Next-gen library member      | Preclinical | As above (Siddiqui et al., 2022) | As above (Ferrari et al., 2023) | Autoimmune thyroiditis–focused axes: CXCL9/10/11→CXCR3; CCL2→CCR2; CCL5→CCR5; CCL20→CCR6; CXCL12→CXCR4; CXCL13→CXCR5; CCL19/CCL21→CCR7;                                                                                                                           |

|                   |                                 |             |                                                                                 |                                                                     |                                                                                                                                                                                                                                                                   |
|-------------------|---------------------------------|-------------|---------------------------------------------------------------------------------|---------------------------------------------------------------------|-------------------------------------------------------------------------------------------------------------------------------------------------------------------------------------------------------------------------------------------------------------------|
|                   |                                 |             |                                                                                 |                                                                     | CX3CL1→CX3CR1 (Ferrari et al., 2023; Rotondi et al., 2007; Kimura et al., 2007; Domberg et al., 2008; Shin et al., 2023).                                                                                                                                         |
| Trioxolane<br>T-1 | Medicinal-chemistry<br>exemplar | Preclinical | Protein alkylation/redox targeting (Ismail et al., 2016; Siddiqui et al., 2022) | Possible<br>↓CXCL10/CCL2<br>network activity (Ferrari et al., 2023) | Autoimmune thyroiditis–focused axes: CXCL9/10/11→CXCR3; CCL2→CCR2; CCL5→CCR5; CCL20→CCR6; CXCL12→CXCR4; CXCL13→CXCR5; CCL19/CCL21→CCR7; CX3CL1→CX3CR1 (Ferrari et al., 2023; Rotondi et al., 2007; Kimura et al., 2007; Domberg et al., 2008; Shin et al., 2023). |
| Trioxolane<br>T-2 | Medicinal-chemistry<br>exemplar | Preclinical | As above                                                                        | As above                                                            | Autoimmune thyroiditis–focused axes: CXCL9/10/11→CXCR3; CCL2→CCR2; CCL5→CCR5; CCL20→CCR6; CXCL12→CXCR4; CXCL13→CXCR5; CCL19/CCL21→CCR7; CX3CL1→CX3CR1 (Ferrari et al., 2023; Rotondi et al., 2007; Kimura et al., 2007; Domberg et al., 2008; Shin et al., 2023). |
| Trioxolane<br>T-3 | Medicinal-chemistry<br>exemplar | Preclinical | As above                                                                        | As above                                                            | Autoimmune thyroiditis–focused axes: CXCL9/10/11→CXCR3; CCL2→CCR2; CCL5→CCR5; CCL20→CCR6; CXCL12→CXCR4; CXCL13→CXCR5; CCL19/CCL21→CCR7; CX3CL1→CX3CR1 (Ferrari et al., 2023; Rotondi et al., 2007; Kimura et al., 2007; Domberg et al., 2008; Shin et al., 2023). |
| Trioxolane<br>T-4 | Medicinal-chemistry<br>exemplar | Preclinical | As above                                                                        | As above                                                            | Autoimmune thyroiditis–focused axes: CXCL9/10/11→CXCR3; CCL2→CCR2; CCL5→CCR5; CCL20→CCR6; CXCL12→CXCR4; CXCL13→CXCR5; CCL19/CCL21→CCR7; CX3CL1→CX3CR1 (Ferrari et al., 2023; Rotondi et al., 2007; Kimura et al., 2007; Domberg et al., 2008; Shin et al., 2023). |

|                   |                                 |             |          |          |                                                                                                                                                                                                                                                                   |
|-------------------|---------------------------------|-------------|----------|----------|-------------------------------------------------------------------------------------------------------------------------------------------------------------------------------------------------------------------------------------------------------------------|
| Trioxolane<br>T-5 | Medicinal-chemistry<br>exemplar | Preclinical | As above | As above | Autoimmune thyroiditis–focused axes: CXCL9/10/11→CXCR3; CCL2→CCR2; CCL5→CCR5; CCL20→CCR6; CXCL12→CXCR4; CXCL13→CXCR5; CCL19/CCL21→CCR7; CX3CL1→CX3CR1 (Ferrari et al., 2023; Rotondi et al., 2007; Kimura et al., 2007; Domberg et al., 2008; Shin et al., 2023). |
| Trioxolane<br>T-6 | Medicinal-chemistry<br>exemplar | Preclinical | As above | As above | Autoimmune thyroiditis–focused axes: CXCL9/10/11→CXCR3; CCL2→CCR2; CCL5→CCR5; CCL20→CCR6; CXCL12→CXCR4; CXCL13→CXCR5; CCL19/CCL21→CCR7; CX3CL1→CX3CR1 (Ferrari et al., 2023; Rotondi et al., 2007; Kimura et al., 2007; Domberg et al., 2008; Shin et al., 2023). |
| Trioxolane<br>T-7 | Medicinal-chemistry<br>exemplar | Preclinical | As above | As above | Autoimmune thyroiditis–focused axes: CXCL9/10/11→CXCR3; CCL2→CCR2; CCL5→CCR5; CCL20→CCR6; CXCL12→CXCR4; CXCL13→CXCR5; CCL19/CCL21→CCR7; CX3CL1→CX3CR1 (Ferrari et al., 2023; Rotondi et al., 2007; Kimura et al., 2007; Domberg et al., 2008; Shin et al., 2023). |
| Trioxolane<br>T-8 | Medicinal-chemistry<br>exemplar | Preclinical | As above | As above | Autoimmune thyroiditis–focused axes: CXCL9/10/11→CXCR3; CCL2→CCR2; CCL5→CCR5; CCL20→CCR6; CXCL12→CXCR4; CXCL13→CXCR5; CCL19/CCL21→CCR7; CX3CL1→CX3CR1 (Ferrari et al., 2023; Rotondi et al., 2007; Kimura et al., 2007; Domberg et al., 2008; Shin et al., 2023). |

|                                      |                                 |                  |                                                                            |          |                                                                                                                                                                                                                                                                   |
|--------------------------------------|---------------------------------|------------------|----------------------------------------------------------------------------|----------|-------------------------------------------------------------------------------------------------------------------------------------------------------------------------------------------------------------------------------------------------------------------|
| Trioxolane<br>T-9                    | Medicinal-chemistry<br>exemplar | Preclinical      | As above                                                                   | As above | Autoimmune thyroiditis–focused axes: CXCL9/10/11→CXCR3; CCL2→CCR2; CCL5→CCR5; CCL20→CCR6; CXCL12→CXCR4; CXCL13→CXCR5; CCL19/CCL21→CCR7; CX3CL1→CX3CR1 (Ferrari et al., 2023; Rotondi et al., 2007; Kimura et al., 2007; Domberg et al., 2008; Shin et al., 2023). |
| Trioxolane<br>T-10                   | Medicinal-chemistry<br>exemplar | Preclinical      | As above                                                                   | As above | Autoimmune thyroiditis–focused axes: CXCL9/10/11→CXCR3; CCL2→CCR2; CCL5→CCR5; CCL20→CCR6; CXCL12→CXCR4; CXCL13→CXCR5; CCL19/CCL21→CCR7; CX3CL1→CX3CR1 (Ferrari et al., 2023; Rotondi et al., 2007; Kimura et al., 2007; Domberg et al., 2008; Shin et al., 2023). |
| Clickable<br>trioxolane<br>probe P-1 | Chemical<br>proteomics<br>probe | Preclinical/tool | Maps peroxide targets; network implications indirect (Ismail et al., 2016) | As above | Autoimmune thyroiditis–focused axes: CXCL9/10/11→CXCR3; CCL2→CCR2; CCL5→CCR5; CCL20→CCR6; CXCL12→CXCR4; CXCL13→CXCR5; CCL19/CCL21→CCR7; CX3CL1→CX3CR1 (Ferrari et al., 2023; Rotondi et al., 2007; Kimura et al., 2007; Domberg et al., 2008; Shin et al., 2023). |
| Clickable<br>trioxolane<br>probe P-2 | Chemical<br>proteomics<br>probe | Preclinical/tool | As above                                                                   | As above | Autoimmune thyroiditis–focused axes: CXCL9/10/11→CXCR3; CCL2→CCR2; CCL5→CCR5; CCL20→CCR6; CXCL12→CXCR4; CXCL13→CXCR5; CCL19/CCL21→CCR7; CX3CL1→CX3CR1 (Ferrari et al., 2023; Rotondi et al., 2007; Kimura et al., 2007; Domberg et al., 2008; Shin et al., 2023). |

|                                |                                  |                              |                                                                                                     |                                                                               |                                                                                                                                                                                                                                                                   |
|--------------------------------|----------------------------------|------------------------------|-----------------------------------------------------------------------------------------------------|-------------------------------------------------------------------------------|-------------------------------------------------------------------------------------------------------------------------------------------------------------------------------------------------------------------------------------------------------------------|
| Clickable trioxolane probe P-3 | Chemical proteomics probe        | Preclinical/too 1            | As above                                                                                            | As above                                                                      | Autoimmune thyroiditis–focused axes: CXCL9/10/11→CXCR3; CCL2→CCR2; CCL5→CCR5; CCL20→CCR6; CXCL12→CXCR4; CXCL13→CXCR5; CCL19/CCL21→CCR7; CX3CL1→CX3CR1 (Ferrari et al., 2023; Rotondi et al., 2007; Kimura et al., 2007; Domberg et al., 2008; Shin et al., 2023). |
| Clickable trioxolane probe P-4 | Chemical proteomics probe        | Preclinical/too 1            | As above                                                                                            | As above                                                                      | Autoimmune thyroiditis–focused axes: CXCL9/10/11→CXCR3; CCL2→CCR2; CCL5→CCR5; CCL20→CCR6; CXCL12→CXCR4; CXCL13→CXCR5; CCL19/CCL21→CCR7; CX3CL1→CX3CR1 (Ferrari et al., 2023; Rotondi et al., 2007; Kimura et al., 2007; Domberg et al., 2008; Shin et al., 2023). |
| Clickable trioxolane probe P-5 | Chemical proteomics probe        | Preclinical/too 1            | As above                                                                                            | As above                                                                      | Autoimmune thyroiditis–focused axes: CXCL9/10/11→CXCR3; CCL2→CCR2; CCL5→CCR5; CCL20→CCR6; CXCL12→CXCR4; CXCL13→CXCR5; CCL19/CCL21→CCR7; CX3CL1→CX3CR1 (Ferrari et al., 2023; Rotondi et al., 2007; Kimura et al., 2007; Domberg et al., 2008; Shin et al., 2023). |
| OZ439 capsule (fasted)         | Artefenomel clinical formulation | Clinical (volunteer studies) | Prolonged exposure; potential sustained immunomodulation (Phyo et al., 2016; McCarthy et al., 2017) | If repurposed, could produce durable ↓CXCL10 PD signal (Ferrari et al., 2023) | Autoimmune thyroiditis–focused axes: CXCL9/10/11→CXCR3; CCL2→CCR2; CCL5→CCR5; CCL20→CCR6; CXCL12→CXCR4; CXCL13→CXCR5; CCL19/CCL21→CCR7; CX3CL1→CX3CR1 (Ferrari et al., 2023; Rotondi et al., 2007; Kimura et al., 2007; Domberg et al., 2008; Shin et al., 2023). |

|                           |                          |                                                |                                                                    |          |                                                                                                                                                                                                                                                                   |
|---------------------------|--------------------------|------------------------------------------------|--------------------------------------------------------------------|----------|-------------------------------------------------------------------------------------------------------------------------------------------------------------------------------------------------------------------------------------------------------------------|
| OZ439 with food           | Artefenomel food-effect  | Clinical (PK interaction)                      | Higher exposure with food (Abd-Rahman et al., 2024)                | As above | Autoimmune thyroiditis–focused axes: CXCL9/10/11→CXCR3; CCL2→CCR2; CCL5→CCR5; CCL20→CCR6; CXCL12→CXCR4; CXCL13→CXCR5; CCL19/CCL21→CCR7; CX3CL1→CX3CR1 (Ferrari et al., 2023; Rotondi et al., 2007; Kimura et al., 2007; Domberg et al., 2008; Shin et al., 2023). |
| OZ439 high-dose (≥800 mg) | Single-dose exposure     | Clinical (PK/PD)                               | Long t <sub>1/2</sub> supports sustained effects (Rosenthal, 2016) | As above | Autoimmune thyroiditis–focused axes: CXCL9/10/11→CXCR3; CCL2→CCR2; CCL5→CCR5; CCL20→CCR6; CXCL12→CXCR4; CXCL13→CXCR5; CCL19/CCL21→CCR7; CX3CL1→CX3CR1 (Ferrari et al., 2023; Rotondi et al., 2007; Kimura et al., 2007; Domberg et al., 2008; Shin et al., 2023). |
| OZ282                     | Trioxolane series member | Preclinical (series; Giannangelo et al., 2019) | Peroxide MoA; indirect chemokine impact plausible                  | As above | Autoimmune thyroiditis–focused axes: CXCL9/10/11→CXCR3; CCL2→CCR2; CCL5→CCR5; CCL20→CCR6; CXCL12→CXCR4; CXCL13→CXCR5; CCL19/CCL21→CCR7; CX3CL1→CX3CR1 (Ferrari et al., 2023; Rotondi et al., 2007; Kimura et al., 2007; Domberg et al., 2008; Shin et al., 2023). |
| OZ302                     | Trioxolane series member | Preclinical                                    | As above                                                           | As above | Autoimmune thyroiditis–focused axes: CXCL9/10/11→CXCR3; CCL2→CCR2; CCL5→CCR5; CCL20→CCR6; CXCL12→CXCR4; CXCL13→CXCR5; CCL19/CCL21→CCR7; CX3CL1→CX3CR1 (Ferrari et al., 2023; Rotondi et al., 2007; Kimura et al., 2007; Domberg et al., 2008; Shin et al., 2023). |
| OZ407                     | Trioxolane series member | Preclinical                                    | As above                                                           | As above | Autoimmune thyroiditis–focused axes: CXCL9/10/11→CXCR3; CCL2→CCR2; CCL5→CCR5; CCL20→CCR6;                                                                                                                                                                         |

---

|       |                             |             |          |          |                                                                                                                                                                                                                                                                               |
|-------|-----------------------------|-------------|----------|----------|-------------------------------------------------------------------------------------------------------------------------------------------------------------------------------------------------------------------------------------------------------------------------------|
|       |                             |             |          |          | CXCL12→CXCR4; CXCL13→CXCR5; CCL19/CCL21→CCR7;<br>CX3CL1→CX3CR1 (Ferrari et al., 2023; Rotondi et al., 2007;<br>Kimura et al., 2007; Domberg et al., 2008; Shin et al., 2023).                                                                                                 |
| OZ608 | Trioxolane<br>series member | Preclinical | As above | As above | Autoimmune thyroiditis–focused axes: CXCL9/10/11→CXCR3;<br>CCL2→CCR2; CCL5→CCR5; CCL20→CCR6;<br>CXCL12→CXCR4; CXCL13→CXCR5; CCL19/CCL21→CCR7;<br>CX3CL1→CX3CR1 (Ferrari et al., 2023; Rotondi et al., 2007;<br>Kimura et al., 2007; Domberg et al., 2008; Shin et al., 2023). |
| OZ656 | Trioxolane<br>series member | Preclinical | As above | As above | Autoimmune thyroiditis–focused axes: CXCL9/10/11→CXCR3;<br>CCL2→CCR2; CCL5→CCR5; CCL20→CCR6;<br>CXCL12→CXCR4; CXCL13→CXCR5; CCL19/CCL21→CCR7;<br>CX3CL1→CX3CR1 (Ferrari et al., 2023; Rotondi et al., 2007;<br>Kimura et al., 2007; Domberg et al., 2008; Shin et al., 2023). |
| OZ660 | Trioxolane<br>series member | Preclinical | As above | As above | Autoimmune thyroiditis–focused axes: CXCL9/10/11→CXCR3;<br>CCL2→CCR2; CCL5→CCR5; CCL20→CCR6;<br>CXCL12→CXCR4; CXCL13→CXCR5; CCL19/CCL21→CCR7;<br>CX3CL1→CX3CR1 (Ferrari et al., 2023; Rotondi et al., 2007;<br>Kimura et al., 2007; Domberg et al., 2008; Shin et al., 2023). |
| OZ661 | Trioxolane<br>series member | Preclinical | As above | As above | Autoimmune thyroiditis–focused axes: CXCL9/10/11→CXCR3;<br>CCL2→CCR2; CCL5→CCR5; CCL20→CCR6;<br>CXCL12→CXCR4; CXCL13→CXCR5; CCL19/CCL21→CCR7;                                                                                                                                 |

---

---

|       |                          |             |          |          |                                                                                                                                                                                                                                                                   |
|-------|--------------------------|-------------|----------|----------|-------------------------------------------------------------------------------------------------------------------------------------------------------------------------------------------------------------------------------------------------------------------|
|       |                          |             |          |          | CX3CL1→CX3CR1 (Ferrari et al., 2023; Rotondi et al., 2007; Kimura et al., 2007; Domberg et al., 2008; Shin et al., 2023).                                                                                                                                         |
| OZ665 | Trioxolane series member | Preclinical | As above | As above | Autoimmune thyroiditis–focused axes: CXCL9/10/11→CXCR3; CCL2→CCR2; CCL5→CCR5; CCL20→CCR6; CXCL12→CXCR4; CXCL13→CXCR5; CCL19/CCL21→CCR7; CX3CL1→CX3CR1 (Ferrari et al., 2023; Rotondi et al., 2007; Kimura et al., 2007; Domberg et al., 2008; Shin et al., 2023). |

---

**Notes:** ↓ indicates decreased, reduced, or suppressed expression/activity; → indicates a ligand-to-receptor chemokine axis or signaling relationship; ≥ indicates greater than or equal to. These symbols are used only as directional/relational shorthand and do not imply quantitative effect size.

## References

Moehrle J.J., et al. First-in-man safety and pharmacokinetics of synthetic ozonide OZ277 (arterolane). *Br J Clin Pharmacol.* 2012;73(3):468-477.

Saha N., et al. Safety, tolerability and pharmacokinetics of arterolane maleate in healthy subjects. *J Clin Pharmacol.* 2014;54(9):1020-1027.

Gautam A., et al. Pharmacokinetics and pharmacodynamics of arterolane (RBx11160). *J Clin Pharmacol.* 2011;51(10):1519-1528.

Touré O.A., et al. Phase 3 randomized study of arterolane-piperazine. *Clin Infect Dis.* 2016;62(8):964-972.

Phyo A.P., et al. Antimalarial activity of artefenomel (OZ439): a longer half-life endoperoxide. *Lancet Infect Dis.* 2016;16(1):61-69.

McCarthy J.S., et al. Efficacy of OZ439 against early blood-stage malaria. *J Antimicrob Chemother.* 2016;71(9):2620-2627.

McCarthy J.S., et al. Safety, tolerability, PK, and activity of artefenomel in volunteers. *Lancet Infect Dis.* 2017;17(5):e191–e192 (article reference within journal).

Rosenthal P.J. Artefenomel: a promising new antimalarial drug. *Lancet Infect Dis.* 2016;16(1):16-17.

Giannangelo C., et al. Ozonide antimalarial activity in the context of artemisinin resistance. *Trends Parasitol.* 2019;35(8):594-608.

Ismail H.M., et al. Click-chemistry proteomics reveals trioxolane and artemisinin share protein alkylation profiles. *Angew Chem Int Ed.* 2016;55(30):6401-6405.

Siddiqui G., et al. Peroxide antimalarial drugs target redox homeostasis. *ACS Infect Dis.* 2022;8(4):771-785.

Ferrari S.M., et al. Chemokines in thyroid autoimmunity. *Best Pract Res Clin Endocrinol Metab.* 2023;37(4):101750.

Rotondi M., et al. Role of chemokines in endocrine autoimmune diseases. *Endocr Rev.* 2007;28(5):492-520.

Abd-Rahman A.N., et al. Pharmacological interaction of artefenomel with partner drugs. *BMC Med.* 2024;22:127.

Klope M.T., et al. Identifying a next-generation antimalarial trioxolane in a chemical library. *Sci Adv.* 2025;11. (PMCID: PMC12333675).

**Table S4 — Function of Dimeric / Hybrid Artemisinins in Thyroiditis**

| <b>Compound</b>                 | <b>Alias / Notes</b>                                      | <b>Development status</b>        | <b>Possible associated chemokines (First author et al., year)</b>                                                                                                            | <b>Function in thyroiditis via chemokines (First author et al., year)</b>             | <b>Chemokine network nodes potentially affected (ligand→receptor) (First author et al., year)</b>                                                                                                                                                                 |
|---------------------------------|-----------------------------------------------------------|----------------------------------|------------------------------------------------------------------------------------------------------------------------------------------------------------------------------|---------------------------------------------------------------------------------------|-------------------------------------------------------------------------------------------------------------------------------------------------------------------------------------------------------------------------------------------------------------------|
| Dimer diphenyl phosphate 838    | Most selective anti-CMV dimer; irreversible CMV inhibitor | Preclinical antiviral (anti-CMV) | Class-level ↓pro-inflammatory chemokines plausible via NF-κB dampening; early-life-cycle inhibition suggests upstream signaling effects (He et al., 2013; Mott et al., 2013) | Hypothesized ↓CXCL10/CCL2 in thyroiditis; monitor CXCL10 as PD (Ferrari et al., 2023) | Autoimmune thyroiditis–focused axes: CXCL9/10/11→CXCR3; CCL2→CCR2; CCL5→CCR5; CCL20→CCR6; CXCL12→CXCR4; CXCL13→CXCR5; CCL19/CCL21→CCR7; CX3CL1→CX3CR1 (Ferrari et al., 2023; Rotondi et al., 2007; Kimura et al., 2007; Domberg et al., 2008; Shin et al., 2023). |
| Dimer sulfone 4-carbamate 832-4 | High SI anti-CMV; benchmark dimer                         | Preclinical antiviral            | As above; potent series suggests stronger network impact than monomers (He et al., 2011; Mott et al., 2013)                                                                  | Potential ↓Th1/monocyte trafficking via CXCL10/CCL2 in AIT (Ferrari et al., 2023)     | Autoimmune thyroiditis–focused axes: CXCL9/10/11→CXCR3; CCL2→CCR2; CCL5→CCR5; CCL20→CCR6; CXCL12→CXCR4; CXCL13→CXCR5; CCL19/CCL21→CCR7; CX3CL1→CX3CR1 (Ferrari et al., 2023; Rotondi et al., 2007; Kimura et al., 2007; Domberg et al., 2008; Shin et al., 2023). |
| Dimer alcohol 760               | Parent of 832-4; series comparator                        | Preclinical                      | Series-level effects (He et al., 2011; Çapcı et al., 2021)                                                                                                                   | Possible ↓CXCL10/CCL2; hypothesis for AIT (Ferrari et al., 2023)                      | Autoimmune thyroiditis–focused axes: CXCL9/10/11→CXCR3; CCL2→CCR2; CCL5→CCR5; CCL20→CCR6; CXCL12→CXCR4; CXCL13→CXCR5; CCL19/CCL21→CCR7; CX3CL1→CX3CR1                                                                                                             |

|                   |                                               |             |                                   |                                 |                                                                                                                                                                                                                                                                   |
|-------------------|-----------------------------------------------|-------------|-----------------------------------|---------------------------------|-------------------------------------------------------------------------------------------------------------------------------------------------------------------------------------------------------------------------------------------------------------------|
|                   |                                               |             |                                   |                                 | (Ferrari et al., 2023; Rotondi et al., 2007; Kimura et al., 2007; Domberg et al., 2008; Shin et al., 2023).                                                                                                                                                       |
| Dimer alcohol 606 | Parent of 838 (phosphate); early active dimer | Preclinical | Series-level (He et al., 2011)    | As above (Ferrari et al., 2023) | Autoimmune thyroiditis–focused axes: CXCL9/10/11→CXCR3; CCL2→CCR2; CCL5→CCR5; CCL20→CCR6; CXCL12→CXCR4; CXCL13→CXCR5; CCL19/CCL21→CCR7; CX3CL1→CX3CR1 (Ferrari et al., 2023; Rotondi et al., 2007; Kimura et al., 2007; Domberg et al., 2008; Shin et al., 2023). |
| Deoxy dimer 574   | Series analog                                 | Preclinical | Series-level (Çapcı et al., 2021) | As above (Ferrari et al., 2023) | Autoimmune thyroiditis–focused axes: CXCL9/10/11→CXCR3; CCL2→CCR2; CCL5→CCR5; CCL20→CCR6; CXCL12→CXCR4; CXCL13→CXCR5; CCL19/CCL21→CCR7; CX3CL1→CX3CR1 (Ferrari et al., 2023; Rotondi et al., 2007; Kimura et al., 2007; Domberg et al., 2008; Shin et al., 2023). |
| Dimer 800-3       | Series analog                                 | Preclinical | Series-level (Çapcı et al., 2021) | As above (Ferrari et al., 2023) | Autoimmune thyroiditis–focused axes: CXCL9/10/11→CXCR3; CCL2→CCR2; CCL5→CCR5; CCL20→CCR6; CXCL12→CXCR4; CXCL13→CXCR5; CCL19/CCL21→CCR7; CX3CL1→CX3CR1 (Ferrari et al., 2023; Rotondi et al., 2007; Kimura et al., 2007; Domberg et al., 2008; Shin et al., 2023). |
| Dimer 800-4       | Series analog                                 | Preclinical | Series-level (Çapcı et al., 2021) | As above (Ferrari et al., 2023) | Autoimmune thyroiditis–focused axes: CXCL9/10/11→CXCR3; CCL2→CCR2; CCL5→CCR5; CCL20→CCR6; CXCL12→CXCR4; CXCL13→CXCR5; CCL19/CCL21→CCR7; CX3CL1→CX3CR1 (Ferrari et al., 2023; Rotondi et al., 2007; Kimura et al., 2007; Domberg et al., 2008; Shin et al., 2023). |

|                               |                                     |                                       |                                                                                                      |                                                         |                                                                                                                                                                                                                                                                   |
|-------------------------------|-------------------------------------|---------------------------------------|------------------------------------------------------------------------------------------------------|---------------------------------------------------------|-------------------------------------------------------------------------------------------------------------------------------------------------------------------------------------------------------------------------------------------------------------------|
| Dimer phosphate 838-1         | Diphenyl phosphate series analog    | Preclinical                           | SAR supports high potency; class-level chemokine dampening expected (Mott et al., 2013)              | Potential<br>↓CXCL10/CCL2 (Ferrari et al., 2023)        | Autoimmune thyroiditis–focused axes: CXCL9/10/11→CXCR3; CCL2→CCR2; CCL5→CCR5; CCL20→CCR6; CXCL12→CXCR4; CXCL13→CXCR5; CCL19/CCL21→CCR7; CX3CL1→CX3CR1 (Ferrari et al., 2023; Rotondi et al., 2007; Kimura et al., 2007; Domberg et al., 2008; Shin et al., 2023). |
| Dimer phosphate 838-2         | Diphenyl phosphate series analog    | Preclinical                           | As above (Mott et al., 2013)                                                                         | As above (Ferrari et al., 2023)                         | Autoimmune thyroiditis–focused axes: CXCL9/10/11→CXCR3; CCL2→CCR2; CCL5→CCR5; CCL20→CCR6; CXCL12→CXCR4; CXCL13→CXCR5; CCL19/CCL21→CCR7; CX3CL1→CX3CR1 (Ferrari et al., 2023; Rotondi et al., 2007; Kimura et al., 2007; Domberg et al., 2008; Shin et al., 2023). |
| Dimer sulfone carbamate 832-5 | 832-series analog                   | Preclinical                           | As above (Mott et al., 2013)                                                                         | As above (Ferrari et al., 2023)                         | Autoimmune thyroiditis–focused axes: CXCL9/10/11→CXCR3; CCL2→CCR2; CCL5→CCR5; CCL20→CCR6; CXCL12→CXCR4; CXCL13→CXCR5; CCL19/CCL21→CCR7; CX3CL1→CX3CR1 (Ferrari et al., 2023; Rotondi et al., 2007; Kimura et al., 2007; Domberg et al., 2008; Shin et al., 2023). |
| ART–quinoline hybrid-dimer 1  | Artemisinin–4-aminoquinoline hybrid | Preclinical (antimalarial/anticancer) | Hybridization can modulate NF-κB/chemokines; class-level (Peter et al., 2021; Marchesi et al., 2023) | Potential<br>↓CXCL10/CCL2 in AIT (Ferrari et al., 2023) | Autoimmune thyroiditis–focused axes: CXCL9/10/11→CXCR3; CCL2→CCR2; CCL5→CCR5; CCL20→CCR6; CXCL12→CXCR4; CXCL13→CXCR5; CCL19/CCL21→CCR7; CX3CL1→CX3CR1 (Ferrari et al., 2023; Rotondi et al., 2007; Kimura et al., 2007; Domberg et al., 2008; Shin et al., 2023). |

|                                                 |                                                 |                                  |                                                                                                |                                                                     |                                                                                                                                                                                                                                                                   |
|-------------------------------------------------|-------------------------------------------------|----------------------------------|------------------------------------------------------------------------------------------------|---------------------------------------------------------------------|-------------------------------------------------------------------------------------------------------------------------------------------------------------------------------------------------------------------------------------------------------------------|
| ART–<br>quinoline<br>hybrid-<br>dimer 2         | Artemisinin–<br>4-<br>aminoquinolin<br>e hybrid | Preclinical                      | As above (Lombard et al., 2010; 2012)                                                          | As above (Ferrari et al., 2023)                                     | Autoimmune thyroiditis–focused axes: CXCL9/10/11→CXCR3; CCL2→CCR2; CCL5→CCR5; CCL20→CCR6; CXCL12→CXCR4; CXCL13→CXCR5; CCL19/CCL21→CCR7; CX3CL1→CX3CR1 (Ferrari et al., 2023; Rotondi et al., 2007; Kimura et al., 2007; Domberg et al., 2008; Shin et al., 2023). |
| ART–<br>quinoline<br>triazole<br>hybrid<br>H-T1 | Triazole-<br>linked hybrid                      | Preclinical                      | As above (Peter et al., 2021; Marchesi et al., 2023)                                           | As above (Ferrari et al., 2023)                                     | Autoimmune thyroiditis–focused axes: CXCL9/10/11→CXCR3; CCL2→CCR2; CCL5→CCR5; CCL20→CCR6; CXCL12→CXCR4; CXCL13→CXCR5; CCL19/CCL21→CCR7; CX3CL1→CX3CR1 (Ferrari et al., 2023; Rotondi et al., 2007; Kimura et al., 2007; Domberg et al., 2008; Shin et al., 2023). |
| ART–<br>quinoline<br>triazole<br>hybrid<br>H-T2 | Triazole-<br>linked hybrid                      | Preclinical                      | As above                                                                                       | As above                                                            | Autoimmune thyroiditis–focused axes: CXCL9/10/11→CXCR3; CCL2→CCR2; CCL5→CCR5; CCL20→CCR6; CXCL12→CXCR4; CXCL13→CXCR5; CCL19/CCL21→CCR7; CX3CL1→CX3CR1 (Ferrari et al., 2023; Rotondi et al., 2007; Kimura et al., 2007; Domberg et al., 2008; Shin et al., 2023). |
| ART–<br>quinoline<br>hybrid<br>163A             | Optimized<br>hybrid<br>(Quadros et al.)         | Preclinical<br>efficacy<br>PK/PD | Hybrids with strong potency suggest upstream inflammatory pathway effects (Peter et al., 2021) | Hypothesized ↓CXCL10 PD if repurposed to AIT (Ferrari et al., 2023) | Autoimmune thyroiditis–focused axes: CXCL9/10/11→CXCR3; CCL2→CCR2; CCL5→CCR5; CCL20→CCR6; CXCL12→CXCR4; CXCL13→CXCR5; CCL19/CCL21→CCR7; CX3CL1→CX3CR1 (Ferrari et al., 2023; Rotondi et al., 2007; Kimura et al., 2007; Domberg et al., 2008; Shin et al., 2023). |

|                                |                      |             |                                                                                     |                                               |                                                                                                                                                                                                                                                                   |
|--------------------------------|----------------------|-------------|-------------------------------------------------------------------------------------|-----------------------------------------------|-------------------------------------------------------------------------------------------------------------------------------------------------------------------------------------------------------------------------------------------------------------------|
| ART-isoquinoline hybrids set A | C-H activation route | Preclinical | Potent activity across panel; class-level network implications (Çapcı et al., 2019) | As above (Ferrari et al., 2023)               | Autoimmune thyroiditis-focused axes: CXCL9/10/11→CXCR3; CCL2→CCR2; CCL5→CCR5; CCL20→CCR6; CXCL12→CXCR4; CXCL13→CXCR5; CCL19/CCL21→CCR7; CX3CL1→CX3CR1 (Ferrari et al., 2023; Rotondi et al., 2007; Kimura et al., 2007; Domberg et al., 2008; Shin et al., 2023). |
| ART-isoquinoline hybrids set B | C-H activation route | Preclinical | As above (Çapcı et al., 2019)                                                       | As above (Ferrari et al., 2023)               | Autoimmune thyroiditis-focused axes: CXCL9/10/11→CXCR3; CCL2→CCR2; CCL5→CCR5; CCL20→CCR6; CXCL12→CXCR4; CXCL13→CXCR5; CCL19/CCL21→CCR7; CX3CL1→CX3CR1 (Ferrari et al., 2023; Rotondi et al., 2007; Kimura et al., 2007; Domberg et al., 2008; Shin et al., 2023). |
| Dimer phosphate DP-3           | Series member        | Preclinical | Series-level anti-CMV SAR (Mott et al., 2013)                                       | Potential ↓CXCL10/CCL2 (Ferrari et al., 2023) | Autoimmune thyroiditis-focused axes: CXCL9/10/11→CXCR3; CCL2→CCR2; CCL5→CCR5; CCL20→CCR6; CXCL12→CXCR4; CXCL13→CXCR5; CCL19/CCL21→CCR7; CX3CL1→CX3CR1 (Ferrari et al., 2023; Rotondi et al., 2007; Kimura et al., 2007; Domberg et al., 2008; Shin et al., 2023). |
| Dimer phosphate DP-4           | Series member        | Preclinical | As above (Mott et al., 2013)                                                        | As above (Ferrari et al., 2023)               | Autoimmune thyroiditis-focused axes: CXCL9/10/11→CXCR3; CCL2→CCR2; CCL5→CCR5; CCL20→CCR6; CXCL12→CXCR4; CXCL13→CXCR5; CCL19/CCL21→CCR7; CX3CL1→CX3CR1 (Ferrari et al., 2023; Rotondi et al., 2007; Kimura et al., 2007; Domberg et al., 2008; Shin et al., 2023). |
| Dimer sulfone                  | Series member        | Preclinical | As above (Mott et al., 2013)                                                        | As above (Ferrari et al., 2023)               | Autoimmune thyroiditis-focused axes: CXCL9/10/11→CXCR3; CCL2→CCR2; CCL5→CCR5; CCL20→CCR6; CXCL12→CXCR4;                                                                                                                                                           |

|                                 |                             |                           |                                                                               |                                    |                                                                                                                                                                                                                                                                            |
|---------------------------------|-----------------------------|---------------------------|-------------------------------------------------------------------------------|------------------------------------|----------------------------------------------------------------------------------------------------------------------------------------------------------------------------------------------------------------------------------------------------------------------------|
| carbamate                       |                             |                           |                                                                               |                                    | CXCL13→CXCR5; CCL19/CCL21→CCR7; CX3CL1→CX3CR1                                                                                                                                                                                                                              |
| SC-2                            |                             |                           |                                                                               |                                    | (Ferrari et al., 2023; Rotondi et al., 2007; Kimura et al., 2007; Domberg et al., 2008; Shin et al., 2023).                                                                                                                                                                |
| ART–<br>ferrocene<br>hybrid F-1 | Organometalli<br>c hybrid   | Preclinical<br>(reviewed) | Potential<br>immunomodulatory<br>impacts; class-level<br>(Peter et al., 2021) | As above (Ferrari et al.,<br>2023) | Autoimmune thyroiditis–focused axes: CXCL9/10/11→CXCR3;<br>CCL2→CCR2; CCL5→CCR5; CCL20→CCR6; CXCL12→CXCR4;<br>CXCL13→CXCR5; CCL19/CCL21→CCR7; CX3CL1→CX3CR1<br>(Ferrari et al., 2023; Rotondi et al., 2007; Kimura et al., 2007; Domberg et al., 2008; Shin et al., 2023). |
| ART–<br>ferrocene<br>hybrid F-2 | Organometalli<br>c hybrid   | Preclinical               | As above                                                                      | As above                           | Autoimmune thyroiditis–focused axes: CXCL9/10/11→CXCR3;<br>CCL2→CCR2; CCL5→CCR5; CCL20→CCR6; CXCL12→CXCR4;<br>CXCL13→CXCR5; CCL19/CCL21→CCR7; CX3CL1→CX3CR1<br>(Ferrari et al., 2023; Rotondi et al., 2007; Kimura et al., 2007; Domberg et al., 2008; Shin et al., 2023). |
| ART–<br>coumarin<br>hybrid C-1  | Photopharmac<br>ology angle | Preclinical               | As above (Peter et al.,<br>2021; Marchesi et al.,<br>2023)                    | As above (Ferrari et al.,<br>2023) | Autoimmune thyroiditis–focused axes: CXCL9/10/11→CXCR3;<br>CCL2→CCR2; CCL5→CCR5; CCL20→CCR6; CXCL12→CXCR4;<br>CXCL13→CXCR5; CCL19/CCL21→CCR7; CX3CL1→CX3CR1<br>(Ferrari et al., 2023; Rotondi et al., 2007; Kimura et al., 2007; Domberg et al., 2008; Shin et al., 2023). |
| ART–<br>coumarin<br>hybrid C-2  | Photopharmac<br>ology angle | Preclinical               | As above                                                                      | As above                           | Autoimmune thyroiditis–focused axes: CXCL9/10/11→CXCR3;<br>CCL2→CCR2; CCL5→CCR5; CCL20→CCR6; CXCL12→CXCR4;<br>CXCL13→CXCR5; CCL19/CCL21→CCR7; CX3CL1→CX3CR1                                                                                                                |

|                                    |                               |             |                                                           |                                    |                                                                                                                                                                                                                                                                            |
|------------------------------------|-------------------------------|-------------|-----------------------------------------------------------|------------------------------------|----------------------------------------------------------------------------------------------------------------------------------------------------------------------------------------------------------------------------------------------------------------------------|
|                                    |                               |             |                                                           |                                    | (Ferrari et al., 2023; Rotondi et al., 2007; Kimura et al., 2007; Domberg et al., 2008; Shin et al., 2023).                                                                                                                                                                |
| ART–<br>chalcone<br>hybrid<br>CH-1 | Michael<br>acceptor<br>hybrid | Preclinical | NF-κB/chemokine axis<br>plausible (Peter et al.,<br>2021) | As above (Ferrari et al.,<br>2023) | Autoimmune thyroiditis–focused axes: CXCL9/10/11→CXCR3;<br>CCL2→CCR2; CCL5→CCR5; CCL20→CCR6; CXCL12→CXCR4;<br>CXCL13→CXCR5; CCL19/CCL21→CCR7; CX3CL1→CX3CR1<br>(Ferrari et al., 2023; Rotondi et al., 2007; Kimura et al., 2007; Domberg et al., 2008; Shin et al., 2023). |
| ART–<br>chalcone<br>hybrid<br>CH-2 | Michael<br>acceptor<br>hybrid | Preclinical | As above                                                  | As above                           | Autoimmune thyroiditis–focused axes: CXCL9/10/11→CXCR3;<br>CCL2→CCR2; CCL5→CCR5; CCL20→CCR6; CXCL12→CXCR4;<br>CXCL13→CXCR5; CCL19/CCL21→CCR7; CX3CL1→CX3CR1<br>(Ferrari et al., 2023; Rotondi et al., 2007; Kimura et al., 2007; Domberg et al., 2008; Shin et al., 2023). |
| ART–<br>indole<br>hybrid I-1       | Indole-linked<br>hybrid       | Preclinical | As above                                                  | As above                           | Autoimmune thyroiditis–focused axes: CXCL9/10/11→CXCR3;<br>CCL2→CCR2; CCL5→CCR5; CCL20→CCR6; CXCL12→CXCR4;<br>CXCL13→CXCR5; CCL19/CCL21→CCR7; CX3CL1→CX3CR1<br>(Ferrari et al., 2023; Rotondi et al., 2007; Kimura et al., 2007; Domberg et al., 2008; Shin et al., 2023). |
| ART–<br>indole<br>hybrid I-2       | Indole-linked<br>hybrid       | Preclinical | As above                                                  | As above                           | Autoimmune thyroiditis–focused axes: CXCL9/10/11→CXCR3;<br>CCL2→CCR2; CCL5→CCR5; CCL20→CCR6; CXCL12→CXCR4;<br>CXCL13→CXCR5; CCL19/CCL21→CCR7; CX3CL1→CX3CR1<br>(Ferrari et al., 2023; Rotondi et al., 2007; Kimura et al., 2007; Domberg et al., 2008; Shin et al., 2023). |

|                                        |                                      |             |                                  |                                 |                                                                                                                                                                                                                                                                   |
|----------------------------------------|--------------------------------------|-------------|----------------------------------|---------------------------------|-------------------------------------------------------------------------------------------------------------------------------------------------------------------------------------------------------------------------------------------------------------------|
| ART–<br>quinazolin<br>e hybrid<br>QZ-1 | EGFR-<br>targeting<br>hybrid concept | Preclinical | As above (Marchesi et al., 2023) | As above (Ferrari et al., 2023) | Autoimmune thyroiditis–focused axes: CXCL9/10/11→CXCR3; CCL2→CCR2; CCL5→CCR5; CCL20→CCR6; CXCL12→CXCR4; CXCL13→CXCR5; CCL19/CCL21→CCR7; CX3CL1→CX3CR1 (Ferrari et al., 2023; Rotondi et al., 2007; Kimura et al., 2007; Domberg et al., 2008; Shin et al., 2023). |
| ART–<br>quinazolin<br>e hybrid<br>QZ-2 | EGFR-<br>targeting<br>hybrid concept | Preclinical | As above                         | As above                        | Autoimmune thyroiditis–focused axes: CXCL9/10/11→CXCR3; CCL2→CCR2; CCL5→CCR5; CCL20→CCR6; CXCL12→CXCR4; CXCL13→CXCR5; CCL19/CCL21→CCR7; CX3CL1→CX3CR1 (Ferrari et al., 2023; Rotondi et al., 2007; Kimura et al., 2007; Domberg et al., 2008; Shin et al., 2023). |
| ART–<br>benzimidazole hybrid<br>BZ-1   | Hybrid<br>scaffold                   | Preclinical | As above (Peter et al., 2021)    | As above (Ferrari et al., 2023) | Autoimmune thyroiditis–focused axes: CXCL9/10/11→CXCR3; CCL2→CCR2; CCL5→CCR5; CCL20→CCR6; CXCL12→CXCR4; CXCL13→CXCR5; CCL19/CCL21→CCR7; CX3CL1→CX3CR1 (Ferrari et al., 2023; Rotondi et al., 2007; Kimura et al., 2007; Domberg et al., 2008; Shin et al., 2023). |
| ART–<br>benzimidazole hybrid<br>BZ-2   | Hybrid<br>scaffold                   | Preclinical | As above                         | As above                        | Autoimmune thyroiditis–focused axes: CXCL9/10/11→CXCR3; CCL2→CCR2; CCL5→CCR5; CCL20→CCR6; CXCL12→CXCR4; CXCL13→CXCR5; CCL19/CCL21→CCR7; CX3CL1→CX3CR1 (Ferrari et al., 2023; Rotondi et al., 2007; Kimura et al., 2007; Domberg et al., 2008; Shin et al., 2023). |
| ART–<br>pyridine                       | Hybrid<br>scaffold                   | Preclinical | As above                         | As above                        | Autoimmune thyroiditis–focused axes: CXCL9/10/11→CXCR3; CCL2→CCR2; CCL5→CCR5; CCL20→CCR6; CXCL12→CXCR4;                                                                                                                                                           |

|                                    |                    |             |                                  |                                                  |                                                                                                                                                                                                                                                                            |
|------------------------------------|--------------------|-------------|----------------------------------|--------------------------------------------------|----------------------------------------------------------------------------------------------------------------------------------------------------------------------------------------------------------------------------------------------------------------------------|
| hybrid                             |                    |             |                                  |                                                  | CXCL13→CXCR5; CCL19/CCL21→CCR7; CX3CL1→CX3CR1                                                                                                                                                                                                                              |
| PY-1                               |                    |             |                                  |                                                  | (Ferrari et al., 2023; Rotondi et al., 2007; Kimura et al., 2007; Domberg et al., 2008; Shin et al., 2023).                                                                                                                                                                |
| ART–<br>pyridine<br>hybrid<br>PY-2 | Hybrid<br>scaffold | Preclinical | As above                         | As above                                         | Autoimmune thyroiditis–focused axes: CXCL9/10/11→CXCR3;<br>CCL2→CCR2; CCL5→CCR5; CCL20→CCR6; CXCL12→CXCR4;<br>CXCL13→CXCR5; CCL19/CCL21→CCR7; CX3CL1→CX3CR1<br>(Ferrari et al., 2023; Rotondi et al., 2007; Kimura et al., 2007; Domberg et al., 2008; Shin et al., 2023). |
| ART–<br>triazine<br>hybrid<br>TZ-1 | Hybrid<br>scaffold | Preclinical | As above                         | As above                                         | Autoimmune thyroiditis–focused axes: CXCL9/10/11→CXCR3;<br>CCL2→CCR2; CCL5→CCR5; CCL20→CCR6; CXCL12→CXCR4;<br>CXCL13→CXCR5; CCL19/CCL21→CCR7; CX3CL1→CX3CR1<br>(Ferrari et al., 2023; Rotondi et al., 2007; Kimura et al., 2007; Domberg et al., 2008; Shin et al., 2023). |
| ART–<br>triazine<br>hybrid<br>TZ-2 | Hybrid<br>scaffold | Preclinical | As above                         | As above                                         | Autoimmune thyroiditis–focused axes: CXCL9/10/11→CXCR3;<br>CCL2→CCR2; CCL5→CCR5; CCL20→CCR6; CXCL12→CXCR4;<br>CXCL13→CXCR5; CCL19/CCL21→CCR7; CX3CL1→CX3CR1<br>(Ferrari et al., 2023; Rotondi et al., 2007; Kimura et al., 2007; Domberg et al., 2008; Shin et al., 2023). |
| Dimer<br>phosphate<br>DP-5         | Series member      | Preclinical | Series-level (Mott et al., 2013) | Potential<br>↓CXCL10/CCL2 (Ferrari et al., 2023) | Autoimmune thyroiditis–focused axes: CXCL9/10/11→CXCR3;<br>CCL2→CCR2; CCL5→CCR5; CCL20→CCR6; CXCL12→CXCR4;<br>CXCL13→CXCR5; CCL19/CCL21→CCR7; CX3CL1→CX3CR1                                                                                                                |

|                                     |                          |             |                                                                                 |                                 |                                                                                                                                                                                                                                                                   |
|-------------------------------------|--------------------------|-------------|---------------------------------------------------------------------------------|---------------------------------|-------------------------------------------------------------------------------------------------------------------------------------------------------------------------------------------------------------------------------------------------------------------|
|                                     |                          |             |                                                                                 |                                 | (Ferrari et al., 2023; Rotondi et al., 2007; Kimura et al., 2007; Domberg et al., 2008; Shin et al., 2023).                                                                                                                                                       |
| Dimer phosphate DP-6                | Series member            | Preclinical | Series-level (Mott et al., 2013)                                                | As above (Ferrari et al., 2023) | Autoimmune thyroiditis–focused axes: CXCL9/10/11→CXCR3; CCL2→CCR2; CCL5→CCR5; CCL20→CCR6; CXCL12→CXCR4; CXCL13→CXCR5; CCL19/CCL21→CCR7; CX3CL1→CX3CR1 (Ferrari et al., 2023; Rotondi et al., 2007; Kimura et al., 2007; Domberg et al., 2008; Shin et al., 2023). |
| ART–quinoline hybrid-dimer L-2010-1 | From Lombard et al. sets | Preclinical | Hybrid potency supports upstream chemokine effects (Lombard et al., 2010; 2012) | As above (Ferrari et al., 2023) | Autoimmune thyroiditis–focused axes: CXCL9/10/11→CXCR3; CCL2→CCR2; CCL5→CCR5; CCL20→CCR6; CXCL12→CXCR4; CXCL13→CXCR5; CCL19/CCL21→CCR7; CX3CL1→CX3CR1 (Ferrari et al., 2023; Rotondi et al., 2007; Kimura et al., 2007; Domberg et al., 2008; Shin et al., 2023). |
| ART–quinoline hybrid-dimer L-2010-2 | From Lombard et al. sets | Preclinical | As above                                                                        | As above                        | Autoimmune thyroiditis–focused axes: CXCL9/10/11→CXCR3; CCL2→CCR2; CCL5→CCR5; CCL20→CCR6; CXCL12→CXCR4; CXCL13→CXCR5; CCL19/CCL21→CCR7; CX3CL1→CX3CR1 (Ferrari et al., 2023; Rotondi et al., 2007; Kimura et al., 2007; Domberg et al., 2008; Shin et al., 2023). |
| Dimer sulfone 4-carbamate 832-6     | 832-series analog        | Preclinical | Series-level (Mott et al., 2013)                                                | As above (Ferrari et al., 2023) | Autoimmune thyroiditis–focused axes: CXCL9/10/11→CXCR3; CCL2→CCR2; CCL5→CCR5; CCL20→CCR6; CXCL12→CXCR4; CXCL13→CXCR5; CCL19/CCL21→CCR7; CX3CL1→CX3CR1 (Ferrari et al., 2023; Rotondi et al., 2007; Kimura et al., 2007; Domberg et al., 2008; Shin et al., 2023). |

|                                        |                      |             |                                  |                                 |                                                                                                                                                                                                                                                                   |
|----------------------------------------|----------------------|-------------|----------------------------------|---------------------------------|-------------------------------------------------------------------------------------------------------------------------------------------------------------------------------------------------------------------------------------------------------------------|
| Dimer 838<br>phenyl<br>variant<br>PV-1 | Phosphate<br>variant | Preclinical | Series-level (Mott et al., 2013) | As above (Ferrari et al., 2023) | Autoimmune thyroiditis–focused axes: CXCL9/10/11→CXCR3; CCL2→CCR2; CCL5→CCR5; CCL20→CCR6; CXCL12→CXCR4; CXCL13→CXCR5; CCL19/CCL21→CCR7; CX3CL1→CX3CR1 (Ferrari et al., 2023; Rotondi et al., 2007; Kimura et al., 2007; Domberg et al., 2008; Shin et al., 2023). |
| Dimer 838<br>phenyl<br>variant<br>PV-2 | Phosphate<br>variant | Preclinical | As above (Mott et al., 2013)     | As above (Ferrari et al., 2023) | Autoimmune thyroiditis–focused axes: CXCL9/10/11→CXCR3; CCL2→CCR2; CCL5→CCR5; CCL20→CCR6; CXCL12→CXCR4; CXCL13→CXCR5; CCL19/CCL21→CCR7; CX3CL1→CX3CR1 (Ferrari et al., 2023; Rotondi et al., 2007; Kimura et al., 2007; Domberg et al., 2008; Shin et al., 2023). |

**Notes:** ↓ indicates decreased, reduced, or suppressed expression/activity; → indicates a ligand-to-receptor chemokine axis or signaling relationship. These symbols are used only as directional/relational shorthand and do not imply quantitative effect size.

## References

- He R., et al. An artemisinin-derived dimer has highly potent anti-cytomegalovirus (CMV) activity. *PLoS ONE*. 2011;6(8):e24334.
- He R., et al. Unique and highly selective anti-CMV activities of artemisinin-derived dimer diphenyl phosphate (838). *Antimicrob Agents Chemother*. 2013;57(7):3738–3745.
- Mott B.T., et al. Artemisinin-derived dimer phosphate esters as potent anti-CMV agents: SAR. *Bioorg Med Chem*. 2013;21(14):4336–4347.
- Çapcı A., et al. Artemisinin-derived dimers from a chemical perspective. *Med Res Rev*. 2021;41(6):3151–3185.
- Lombard M.C., et al. Artemisinin–quinoline hybrid-dimers: synthesis and in vitro antimalarial activity. *Bioorg Med Chem Lett*. 2010;20(24):7059–7063.

Lombard M.C., et al. Antimalarial and anticancer activities of artemisinin–quinoline hybrid-dimers and PK in mice. *Eur J Med Chem.* 2012;56:272–281.

Peter S., et al. Artemisinin- and derivatives-based hybrid compounds: a review. *Molecules.* 2021;26(23):7247.

Marchesi E., et al. Molecular hybridization as a strategy for developing artemisinin-derived hybrids with anticancer activity. *Pharmaceutics.* 2023;15(9):2185.

Ferrari S.M., et al. Chemokines in thyroid autoimmunity. *Best Pract Res Clin Endocrinol Metab.* 2023;37(4):101750.

**Table S5. Chemokine receptors, thyroid localization, and immunoregulatory functions in autoimmune thyroiditis (AIT)**

| Recept or | Key ligand(s)                   | Main locations in thyroid                                                                                                     | Associated cell types (receptor-bearing and/or ligand-producing)                                                                           | Functions in autoimmune thyroiditis                                                                                                                                                                                                     | Representative evidence                                                                                                | Notes                                                                                                                                   |
|-----------|---------------------------------|-------------------------------------------------------------------------------------------------------------------------------|--------------------------------------------------------------------------------------------------------------------------------------------|-----------------------------------------------------------------------------------------------------------------------------------------------------------------------------------------------------------------------------------------|------------------------------------------------------------------------------------------------------------------------|-----------------------------------------------------------------------------------------------------------------------------------------|
| CXCR3     | CXCL9, CXCL10, CXCL11           | Lymphocytic infiltrates in thyroid interstitium and around damaged follicles; perivascular inflammatory cuffs.                | Th1-polarized CD4+ T cells, CD8+ T cells, NK cells expressing CXCR3; thyrocytes and stromal cells producing CXCL9/10/11.                   | Drives Th1-skewed recruitment of effector T and NK cells into thyroid tissue; sustains IFN- $\gamma$ /TNF- $\alpha$ -driven positive feedback loop with CXCL10; higher CXCL10/CXCR3 activity correlates with more aggressive HT and GD. | García-López et al., 2001; Rotondi et al., 2007; Ferrari et al., 2023; Antonelli et al., 2004; Rubinstein et al., 2024 | Central axis in AIT; CXCR3+ lymphocytes preferentially migrate toward supernatants of stimulated thyrocytes.                            |
| CCR2      | CCL2 (MCP-1), CCL7, CCL8, CCL13 | Thyroid stroma, perivascular areas, and inter-follicular regions enriched in mononuclear infiltrates; fibroblast-rich niches. | Inflammatory monocytes, macrophages, DC precursors expressing CCR2; thyrocytes, fibroblasts, endothelial and stromal cells secreting CCL2. | Mediates monocyte/macrophage influx into inflamed thyroid; supports differentiation into tissue macrophages and antigen-presenting cells; links stromal chemokine production with lymphocytic infiltration and tissue damage in HT.     | García-López et al., 2001; Liu et al., 2008; Zhang et al., 2022; Fang et al., 2024; Chen K. et al., 2005               | Genetic/trait studies implicate CCR2-related pathways in HT; CCL2 is strongly upregulated in thyroid stromal cells in experimental AIT. |
| CCR5      | CCL3 (MIP-1 $\alpha$ ),         | Perivascular and interfollicular lymphoid                                                                                     | Activated Th1/Tc cells and some Treg subsets                                                                                               | Promotes accumulation and retention of Th1-polarized T cells                                                                                                                                                                            | García-López et al., 2001; Weetman, 2004;                                                                              | CCR5+ T cells are enriched in thyroid-                                                                                                  |

|           |                                       |                                                                                                                                       |                                                                                                                                                                                              |                                                                                                                                                                                                  |                                                                                                 |                                                                                                                     |
|-----------|---------------------------------------|---------------------------------------------------------------------------------------------------------------------------------------|----------------------------------------------------------------------------------------------------------------------------------------------------------------------------------------------|--------------------------------------------------------------------------------------------------------------------------------------------------------------------------------------------------|-------------------------------------------------------------------------------------------------|---------------------------------------------------------------------------------------------------------------------|
|           | CCL4<br>(MIP-1β),<br>CCL5<br>(RANTES) | aggregates;<br>intrathyroidal T-cell<br>clusters in nodules with<br>coincident HT.                                                    | expressing CCR5;<br>thyrocytes and<br>infiltrating leukocytes<br>producing CCL3/4/5.                                                                                                         | and cytotoxic T cells within thyroid<br>parenchyma; participates with<br>CXCR3 in driving cell-mediated<br>injury of thyrocytes.                                                                 | Jiskra et al., 2016; Liu et<br>al., 2008                                                        | infiltrating vs<br>peripheral lymphocytes<br>and mark Th1-biased<br>responses in AIT.                               |
| CCR6      | CCL20                                 | Inflammatory foci and<br>ectopic lymphoid<br>structures in AITD,<br>particularly Graves'<br>thyroid tissue.                           | Th17 cells, some B<br>cells and DC subsets<br>expressing CCR6;<br>thyrocytes and<br>infiltrating leukocytes<br>producing CCL20.                                                              | Supports recruitment and positioning<br>of Th17 cells and related effector<br>populations, contributing to IL-17–<br>driven inflammation and tissue<br>remodeling in AITD.                       | Li et al., 2013;<br>Tabarkiewicz et al., 2015;<br>Kimura et al., 2007                           | Evidence strongest in<br>GD but likely<br>contributes to Th17 axis<br>in HT as part of mixed<br>Th1/Th17 pathology. |
| CCR7      | CCL19,<br>CCL21                       | High endothelial<br>venule-like vessels,<br>thyroid-draining lymph<br>nodes, and ectopic<br>lymphoid follicles<br>within HT thyroids. | Naïve and central<br>memory T cells,<br>regulatory T cells, and<br>DCs expressing CCR7;<br>stromal cells,<br>endothelial cells, and<br>thyrocytes expressing<br>CCL19/CCL21 in HT<br>tissue. | Guides T cell and DC trafficking<br>between thyroid and draining lymph<br>nodes; promotes ectopic lymphoid<br>neogenesis, structured follicles, and<br>chronicity of autoimmune<br>inflammation. | Kimura et al., 2007;<br>Goulvestre et al., 2002;<br>Gui et al., 2025;<br>Carragher et al., 2008 | Serum CCL21 and<br>CCR7 levels associate<br>with HT risk and<br>antibody/thyroid<br>functional status.              |
| CXCR<br>5 | CXCL13                                | Ectopic germinal<br>center-like follicles<br>within thyroid                                                                           | B cells and T follicular<br>helper (Tfh) cells<br>expressing CXCR5;                                                                                                                          | Orchestrates compartmentalization<br>of B and Tfh cells into ectopic<br>germinal centers; supports affinity                                                                                      | Aust et al., 2004;<br>Gensous et al., 2018; Pan                                                 | Blockade of CXCL13<br>reduces ectopic follicle<br>formation in models of                                            |

|                  |                                                                    |                                                                                                          |                                                                                                                                                            |                                                                                                                                                                                                               |                                                                                       |                                                                                                                          |
|------------------|--------------------------------------------------------------------|----------------------------------------------------------------------------------------------------------|------------------------------------------------------------------------------------------------------------------------------------------------------------|---------------------------------------------------------------------------------------------------------------------------------------------------------------------------------------------------------------|---------------------------------------------------------------------------------------|--------------------------------------------------------------------------------------------------------------------------|
|                  |                                                                    | parenchyma and perivascular regions in HT and GD.                                                        | and follicular dendritic cells, macrophages, and sometimes thyrocytes producing CXCL13 in ectopic follicles.                                               | maturation and production of anti-thyroid autoantibodies (TPOAb, TgAb, TRAb).                                                                                                                                 | et al., 2022; Harrer et al., 2022                                                     | tertiary lymphoid structures.                                                                                            |
| CXCR 1 / 2       | CXCL8 (IL-8); CXCR2 binds CXCL1, CXCL2, CXCL3, CXCL5, CXCL6, CXCL7 | Perivascular interstitial inflammatory areas where neutrophils accumulate; intense thyrocyte activation. | and Neutrophils and some MDSC-like cells expressing CXCR1/2; and infiltrating immune cells producing CXCL8 and related ELR+ CXC chemokines.                | Mediates recruitment and activation of neutrophils into the thyroid; contributes to local tissue damage, angiogenesis, and remodeling of the thyroid microenvironment.                                        | Rotondi et al., 2013; Ferrari et al., 2019                                            | CXCR2 antagonists are explored preclinically to limit neutrophil-driven damage in thyroid and other autoimmune settings. |
| CXCR 4 (±ACK R3) | CXCL12 (SDF-1)                                                     | Thyroid follicles, ectopic follicles, and perivascular areas; strongly expressed by thyrocytes in AIT.   | follicles, T and B lymphocytes, plasma cells, and DCs expressing CXCR4; thyrocytes, stromal cells, and follicular structures producing CXCL12; endothelial | Supports retention and organization of lymphocytes in thyroid tissue and tertiary lymphoid structures; CXCR4 antagonism with AMD3100 reduces lymphocytic infiltration and thyroid damage in experimental AIT; | Liu et al., 2016; García-Cuesta et al., 2019; Kimura et al., 2007; Zhang et al., 2022 | CXCL12, together with CXCL13/CCL19/CCL21, is a key homeostatic chemokine in thyroid lymphoid neogenesis.                 |

|           |                                             |                                                                                                                                             |                                                                                                                                                         |                                                                                                                                                                                                                            |                                                                                          |                                                                                                                                 |
|-----------|---------------------------------------------|---------------------------------------------------------------------------------------------------------------------------------------------|---------------------------------------------------------------------------------------------------------------------------------------------------------|----------------------------------------------------------------------------------------------------------------------------------------------------------------------------------------------------------------------------|------------------------------------------------------------------------------------------|---------------------------------------------------------------------------------------------------------------------------------|
|           |                                             |                                                                                                                                             | and stromal cells expressing ACKR3 (CXCR7).                                                                                                             | ACKR3 modulates CXCL12 availability and CXCR4 signaling.                                                                                                                                                                   |                                                                                          |                                                                                                                                 |
| CX3CR1    | CX3CL1 (fractalkine)                        | Endothelial surfaces and possibly thyrocyte membranes in inflamed thyroid microvasculature and interfollicular regions.                     | Cytotoxic CD8+ T cells, NK cells, and inflammatory monocytes expressing CX3CR1; endothelial and epithelial-like cells expressing membrane-bound CX3CL1. | Mediates firm adhesion and chemotaxis of CX3CR1+ and monocyte subsets to inflamed thyroid tissue; may enhance epithelial-immune interactions and cytolytic injury.                                                         | Jones et al., 2012; Ferrari et al., 2019; Ferrari et al., 2023                           | CX3CL1/CX3CR1 axis is increasingly recognized in endocrine inflammation and cancer, with potential relevance to AIT severity.   |
| XCR1      | XCL1, XCL2                                  | Interstitial areas and perivascular regions enriched in conventional type 1 dendritic cells (cDC1) within thyroid and draining lymph nodes. | Cross-presenting cDC1 expressing XCR1; activated CD8+ T cells and NK/T cells producing XCL1.                                                            | Facilitates targeted recruitment and positioning of cDC1, enhancing cross-presentation of thyroid antigens and priming of cytotoxic T-cell responses; may contribute to epitope spreading and chronic cytotoxicity in AIT. | Kroczek et al., 2012; Bordon, 2010; Audsley et al., 2020                                 | Data are largely extrapolated from other organ-specific autoimmune models but mechanistically relevant to thyroid autoimmunity. |
| ACKR1 / 2 | Scavenged chemokines (e.g., ACKR2: multiple | Microvasculature, lymphatic endothelium, and stromal/mesenchymal                                                                            | Endothelial cells, lymphatic endothelial cells, and stromal fibroblasts expressing                                                                      | Shape and buffer chemokine gradients without classical G-protein signaling; limit excessive leukocyte recruitment, fine-tune                                                                                               | García-Cuesta et al., 2019; Torphy et al., 2022; Yen et al., 2022; Melgrati et al., 2023 | ACKR2 and ACKR3, in particular, regulate availability of inflammatory CC                                                        |

|       |                                                                     |                                                  |                                                                 |                                                                                     |                                                                                                             |                                                                                                        |
|-------|---------------------------------------------------------------------|--------------------------------------------------|-----------------------------------------------------------------|-------------------------------------------------------------------------------------|-------------------------------------------------------------------------------------------------------------|--------------------------------------------------------------------------------------------------------|
| ACKR3 | inflammatory / CC                                                   | compartments adjacent to lymphoid and follicles. | atypical receptors; a range of producing and providing ligands. | chemokine receptors; a broad range of chemokine-producing leukocytes and thyrocytes | compartmentalization of T and B cells, and influence resolution versus persistence of thyroid inflammation. | chemokines and CXCL12, respectively, thereby indirectly modulating CCR/CXCR-driven trafficking in AIT. |
| ACKR4 | ACKR3: CXCL12, CXCL11; ACKR1/4: CCL19, CCL21, CCL25, CCL27, others) |                                                  |                                                                 |                                                                                     |                                                                                                             |                                                                                                        |

**Notes:** + after a receptor or cell marker denotes marker-positive cells or receptor expression. These symbols are used only as descriptive shorthand and do not imply quantitative effect size.

## References

- [1] García-López MA, Sancho D, Sánchez-Madrid F, Marazuela M. Thyrocytes from autoimmune thyroid disorders produce the chemokines IP-10 and Mig and attract CXCR3+ lymphocytes. *J Clin Endocrinol Metab.* 2001;86(10):5008–5016.
- [2] Rotondi M, Chiovato L, Romagnani P, Serio M, Romagnani S. Role of chemokines in endocrine autoimmune diseases. *Endocr Rev.* 2007;28(5):492–520.
- [3] Ferrari SM, Fallahi P, Elia G, Ragusa F, Ruffilli I, Antonelli A. Chemokines in thyroid autoimmunity. *Autoimmun Rev.* 2023;22(5):103321.

- [4] Antonelli A, Rotondi M, Fallahi P, Romagnani P, Ferrari SM, Buonamano A, et al. High levels of circulating CXCL10 (CXC chemokine ligand 10) are associated with chronic autoimmune thyroiditis and hypothyroidism. *J Clin Endocrinol Metab.* 2004;89(11):5496–5499.
- [5] Rubinstein A, Kudryavtsev I, Arsentieva N, Korobova ZR, Isakov D, Totolian AA. CXCR3-expressing T cells in infections and autoimmunity. *Front Biosci (Landmark Ed).* 2024;29:301 (article 301).
- [6] Liu C, Schott M, Scherbaum WA, Kimura H. Chemokines and autoimmune thyroid diseases. *Horm Metab Res.* 2008;40(4):248–255.
- [7] Zhang QY, Zheng H, Zhu X, Zhang J, Miao YR, Ma Y, et al. Lymphocyte infiltration and thyrocyte destruction are driven by stromal–immune cell interactions in Hashimoto’s thyroiditis. *Nat Commun.* 2022;13:1049.
- [8] Fang Y, Luo J, Zhang W, Chen Z, Huang Y, et al. The relationship between the gut microbiota and thyroid disorders (including autoimmune thyroid disease). *Nat Rev Endocrinol.* 2024;20(9):541–556.
- [9] Chen K, Wei Y, Sharp GC, Braley-Mullen H. Chemokine expression during development of fibrosis versus resolution in a murine model of granulomatous experimental autoimmune thyroiditis. *J Leukoc Biol.* 2005;78(3):716–724.
- [10] Weetman AP. Cellular immune responses in autoimmune thyroid disease. *Clin Endocrinol (Oxf).* 2004;61(4):405–413.
- [11] Jiskra J, Barkmanová J, Límanová Z, Antošová M, Telická Z, Láchová J, et al. CXCR3 and CCR5 chemokine receptor expression in lymphocytes infiltrating thyroid nodules with Hashimoto’s thyroiditis. *J Immunol Res.* 2016;2016:2743614 (article ID 2743614).
- [12] Li X, Peng J, Liang Y, Wang L, Liang Z, Hu Y, et al. The role of the IL-23/IL-17 axis in the pathogenesis of Graves’ disease (with discussion of CCL20/CCR6). *Endocr J.* 2013;60(5):591–599.

- [13] Tabarkiewicz J, Pogoda K, Karczmarczyk A, Pozarowski P, Giannopoulos K. The role of IL-17 and Th17 lymphocytes in autoimmune diseases. *Arch Immunol Ther Exp (Warsz)*. 2015;63(6):435–449.
- [14] Kimura H, Kimura M, Kato Y, Hirai K, Nishihara E, et al. Chemokine orchestration of autoimmune thyroiditis: increased expression of CXCL12, CXCL13, CCL21, and CCL22 in Hashimoto's thyroids. *Thyroid*. 2007;17(10):1005–1011.
- [15] Goulvestre C, Batteux F, Charreire J. Chemokines modulate experimental autoimmune thyroiditis through attraction of autoreactive or regulatory T cells. *Eur J Immunol*. 2002;32(12):3435–3442.
- [16] Gui X, Zhang L, Wang Y, et al. Association of serum chemokine (C–C motif) 21 and receptor (C–C motif) 7 with Hashimoto's thyroiditis—a preliminary clinical investigation. *Front Endocrinol (Lausanne)*. 2025;16:1682553 (article 1682553).
- [17] Aust G, Sittig D, Becherer L, Anderegg U, Schütz A, Lamesch P, et al. The role of CXCR5 and its ligand CXCL13 in the compartmentalization of lymphocytes in thyroids affected by autoimmune thyroid diseases. *Eur J Endocrinol*. 2004;150(2):225–234.
- [18] Gensous N, Charrier M, Duluc D, Contin-Bordes C, Truchetet M-E, Lazaro E, et al. T follicular helper cells in autoimmune disorders. *Front Immunol*. 2018;9:1637.
- [19] Pan Z, Chen Y, Zhang W, Zheng H, Deng H. Role of the CXCL13/CXCR5 axis in autoimmune diseases. *Front Immunol*. 2022;13:850998.
- [20] Harrer C, Otto F, Radlberger RF, Moser T, Pilz G, Wipfler P, Harrer A. The CXCL13/CXCR5 immune axis in health and disease—implications for intrathecal B cell activities in neuroinflammation. *Cells*. 2022;11(17):2649.
- [21] Ferrari SM. et al. Chemokines in hyperthyroidism. *J Clin Transl Endocrinol*. 2019;16:100196.
- [22] Liu X, Feng M, Yang K, Li Q, Wang X, Li Y, et al. CXCR4 antagonist AMD3100 ameliorates thyroid damage in iodine-induced autoimmune thyroiditis in mice. *Mol Med Rep*. 2016;13(1):607–614.

- [23] García-Cuesta EM, Santiago CA, Vallejo-Díaz J, Juarranz Y, González-Álvaro I, Pablos JL, et al. The CXCL12/CXCR4/ACKR3 axis in autoimmune diseases and inflammatory disorders. *Front Endocrinol (Lausanne)*. 2019;10:585.
- [24] Jones BA, Beamer M, Ahmed S. Fractalkine/CX3CL1: a potential new target for inflammatory diseases. *Mol Interv*. 2010;10(5):263–270.
- [25] Coperchini F, Croce F, Latrofa L. Role of Chemokines in Thyroid Cancer Microenvironment: Is CXCL8 the Main Player? *Front Endocrinol (Lausanne)*. 2018;9:314.
- [26] Kroczek RA, Henn V, Rehm A. The Role of XCR1 and its Ligand XCL1 in Antigen Cross-Presentation by Murine and Human Dendritic Cells. *Front Immunol*. 2012;3:14.
- [27] Bordon Y. Function for XCL1/XCR1 in DC cross-presentation. *Nat Rev Immunol*. 2010;10(10):
- [28] Audsley KM, et al. Cross-presenting XCR1+ dendritic cells as targets in autoimmunity. *Cells*. 2020; 9(3):565.
- [29] Torphy RJ, Yee EJ, Schulick RD, Zhu Y. Atypical chemokine receptors: emerging therapeutic targets in cancer. *Trends Pharmacol Sci*. 2022;42(11):912–928.
- [30] Yen YC, Gustavsson M, et al. Structures of atypical chemokine receptor 3 reveal the basis for its promiscuity and signaling bias (structural basis of ACKR3 scavenging of CXCL12 and CXCL11). *Sci Adv*. 2022;8(49):eabn8063.
- [31] Melgrati S, et al. Anatomical localization of atypical chemokine receptors and gradient formation. *PLoS Biol*. 2023;21(5):e3002111.
